# Supplementary material for: Formation of skill of interpretation of legal documents and potential of graphic means registrations of the text
Source: eLife journal article supplement (doi:10.7554/elife.58178), 2011-01-01
Supplement: supp [file elife-58178-supp-v1.zip]

Figure 4 - figure supplement 1

|             |            | Plasmid 1<br>Oct-3/4 |    | Plasmid 2<br>KLF4 |    | Plasmid 3<br>Lin28 |    | Plasmid 4,5<br>EBNA/p53 |    | Plasmid 1<br>Oct-3/4 |    | Plasmid 2<br>KLF4 |    | Plasmid 3<br>Lin28 |    | Plasmid 4,5<br>EBNA/p53 |    |
|-------------|------------|----------------------|----|-------------------|----|--------------------|----|-------------------------|----|----------------------|----|-------------------|----|--------------------|----|-------------------------|----|
|             |            | Int                  | Tr | Int               | Tr | Int                | Tr | Int                     | Tr | Int                  | Tr | Int               | Tr | Int                | Tr | Int                     | Tr |
| Deletion    | DEL_1_2    |                      |    |                   |    |                    |    | NA                      | NA |                      |    |                   |    |                    |    | NA                      | NA |
|             | DEL_1_3    |                      |    |                   |    |                    |    | NA                      | NA |                      |    |                   |    |                    |    | NA                      | NA |
|             | DEL_1_4    |                      |    |                   |    |                    |    | NA                      | NA |                      |    |                   |    |                    |    | NA                      | NA |
|             | DEL_2_3    |                      |    |                   |    |                    |    | NA                      | NA |                      |    |                   |    |                    |    | NA                      | NA |
|             | DEL_2_4    |                      |    |                   |    |                    |    | NA                      | NA |                      |    |                   |    |                    |    | NA                      | NA |
|             | DEL_3_1    |                      |    |                   |    |                    |    | NA                      | NA |                      |    |                   |    |                    |    | NA                      | NA |
|             | DEL_3_3    |                      |    |                   |    |                    |    | NA                      | NA |                      |    |                   |    |                    |    | NA                      | NA |
|             | DEL_4_1    |                      |    |                   |    |                    |    | NA                      | NA |                      |    |                   |    |                    |    | NA                      | NA |
|             | DEL_4_2    |                      |    |                   |    |                    |    | NA                      | NA |                      |    |                   |    |                    |    | NA                      | NA |
|             | DEL_4_3    |                      |    |                   |    |                    |    | NA                      | NA |                      |    |                   |    |                    |    | NA                      | NA |
|             | DEL_5_7    |                      |    |                   |    |                    |    | NA                      | NA |                      |    |                   |    |                    |    | NA                      | NA |
|             | DEL_5_8    |                      |    |                   |    |                    |    | NA                      | NA |                      |    |                   |    |                    |    | NA                      | NA |
|             | DEL_5_9    |                      |    |                   |    |                    |    | NA                      | NA |                      |    |                   |    |                    |    | NA                      | NA |
|             | DEL_5_979  |                      |    |                   |    |                    |    |                         |    |                      |    |                   |    |                    |    |                         |    |
|             | DEL_5_980  |                      |    |                   |    |                    |    |                         |    |                      |    |                   |    |                    |    |                         |    |
|             | DEL_5_983  |                      |    |                   |    |                    |    |                         |    |                      |    |                   |    |                    |    |                         |    |
|             | DEL_6_7    |                      |    |                   |    |                    |    | NA                      | NA |                      |    |                   |    |                    |    | NA                      | NA |
|             | DEL_6_8    |                      |    |                   |    |                    |    | NA                      | NA |                      |    |                   |    |                    |    | NA                      | NA |
|             | DEL_6_9    |                      |    |                   |    |                    |    | NA                      | NA |                      |    |                   |    |                    |    | NA                      | NA |
|             | DEL_7_1    |                      |    |                   |    |                    |    | NA                      | NA |                      |    |                   |    |                    |    | NA                      | NA |
|             | DEL_7_2    |                      |    |                   |    |                    |    | NA                      | NA |                      |    |                   |    |                    |    | NA                      | NA |
|             | DEL_7_3    |                      |    |                   |    |                    |    | NA                      | NA |                      |    |                   |    |                    |    | NA                      | NA |
|             | DEL_9_984  |                      |    |                   |    |                    |    |                         |    |                      |    |                   |    |                    |    |                         |    |
|             | DEL_9_986  |                      |    |                   |    |                    |    |                         |    |                      |    |                   |    |                    |    |                         |    |
|             | DEL_9_987  |                      |    |                   |    |                    |    |                         |    |                      |    |                   |    |                    |    |                         |    |
|             | DEL_8_2    |                      |    |                   |    |                    |    | NA                      | NA |                      |    |                   |    |                    |    | NA                      | NA |
|             | DEL_8_3    |                      |    |                   |    |                    |    | NA                      | NA |                      |    |                   |    |                    |    | NA                      | NA |
|             | DEL_8_4    |                      |    |                   |    |                    |    | NA                      | NA |                      |    |                   |    |                    |    | NA                      | NA |
|             | DEL_10_989 |                      |    |                   |    |                    |    |                         |    |                      |    |                   |    |                    |    |                         |    |
|             | DEL_10_991 |                      |    |                   |    |                    |    |                         |    |                      |    |                   |    |                    |    |                         |    |
|             | DEL_10_993 |                      |    |                   |    |                    |    |                         |    |                      |    |                   |    |                    |    |                         |    |
| Duplication | DUP_1_1    |                      |    |                   |    |                    |    | NA                      | NA |                      |    |                   |    |                    |    | NA                      | NA |
|             | DUP_1_7    |                      |    |                   |    |                    |    | NA                      | NA |                      |    |                   |    |                    |    | NA                      | NA |
|             | DUP_1_8    |                      |    |                   |    |                    |    | NA                      | NA |                      |    |                   |    |                    |    | NA                      | NA |
|             | DUP_1_9    |                      |    |                   |    |                    |    | NA                      | NA |                      |    |                   |    |                    |    | NA                      | NA |
|             | DUP_2_1    |                      |    |                   |    |                    |    | NA                      | NA |                      |    |                   |    |                    |    | NA                      | NA |
|             | DUP_2_2    |                      |    |                   |    |                    |    | NA                      | NA |                      |    |                   |    |                    |    | NA                      | NA |
|             | DUP_2_3    |                      |    |                   |    |                    |    | NA                      | NA |                      |    |                   |    |                    |    | NA                      | NA |
|             | DUP_3_1    |                      |    |                   |    |                    |    | NA                      | NA |                      |    |                   |    |                    |    | NA                      | NA |
|             | DUP_3_2    |                      |    |                   |    |                    |    | NA                      | NA |                      |    |                   |    |                    |    | NA                      | NA |
|             | DUP_3_3    |                      |    |                   |    |                    |    | NA                      | NA |                      |    |                   |    |                    |    | NA                      | NA |
