# Supplementary material for: 16p11.2 microdeletion imparts transcriptional alterations in human iPSC-derived models of early neural development
Source: eLife. 2020 Nov 10;9:e58178. doi: 10.7554/eLife.58178 (PMC7695459; doi:10.7554/eLife.58178)
Supplement: Supplementary file 1. — Abbreviations: NA, not applicable; ND, not determined. [file elife-58178-supp1.xlsx]

## Sheet: Table 1
	Supplemental Table 1
	Identifier				Demographic Information					Clinical Features														Physical Attributes									Deletion, Duplication Breakpoint Information
																																	SFARI Reported Breakpoint			Capital Bio Nearest Flanking SNP
	SFARI Subject ID	Source Cell ID	RUCDR Cell Line ID	Roth and Meunch et. al., hiPSC Clone ID	Age at Sample Collection	Sex	16p11.2 CNV	Relation to Proband	Mutation Inheritance	Age at Evaluation	ADHD	Anxiety, OCD, Phobia	Articulation Disorder	ASD	Behavior Disorder	Coordination Disorder	Enuresis	Full Scale IQ	Language Disorder	Learning Disorder	Mood Disorder	Motor Disorder	Tourette's Disorder	Age at Evaluation	Head Circumference	Head Circum. Z Score	Height	Height Z Score	Weight	Weight Z Score	BMI	BMI Z Score	Low	High	Length	Low	High	Length
	14710.x6	SV0000503	SV0001459	DEL_1_2	41	Male	Deletion	Father	Unknown	39	FALSE	FALSE	FALSE	FALSE	FALSE	FALSE	FALSE	85	FALSE	FALSE	FALSE	FALSE	FALSE	41	56.25	0.8	165	-1.65023	103.7	2.00686	38.09	2.43905	29646320	30197341	551021	29425200	30227504	802304
	14710.x6	SV0000503	SV0001459	DEL_1_3	41	Male	Deletion	Father	Unknown	39	FALSE	FALSE	FALSE	FALSE	FALSE	FALSE	FALSE	85	FALSE	FALSE	FALSE	FALSE	FALSE	41	56.25	0.8	165	-1.65023	103.7	2.00686	38.09	2.43905	29646320	30197341	551021	29488112	30214457	726345
	14710.x6	SV0000503	SV0001459	DEL_1_4	41	Male	Deletion	Father	Unknown	39	FALSE	FALSE	FALSE	FALSE	FALSE	FALSE	FALSE	85	FALSE	FALSE	FALSE	FALSE	FALSE	41	56.25	0.8	165	-1.65023	103.7	2.00686	38.09	2.43905	29646320	30197341	551021	29498829	30214457	715628
	14732.x6	NA	NA	DEL_2_3	12	Female	Deletion	Proband	Unknown	10	FALSE	TRUE	TRUE	TRUE	FALSE	FALSE	FALSE	54	FALSE	FALSE	FALSE	FALSE	FALSE	10	53.5	0.68	154.5	1.47349	39	0.252958	16.3383	-0.476546	29581468	30098094	516626	ND	ND	ND
	14732.x6	NA	NA	DEL_2_4	12	Female	Deletion	Proband	Unknown	10	FALSE	TRUE	TRUE	TRUE	FALSE	FALSE	FALSE	54	FALSE	FALSE	FALSE	FALSE	FALSE	10	53.5	0.68	154.5	1.47349	39	0.252958	16.3383	-0.476546	29581468	30098094	516626	ND	ND	ND
	14739.x3	SV0000530	SV0001453	DEL_3_1	9	Male	Deletion	Proband	Unknown	7	FALSE	FALSE	FALSE	FALSE	FALSE	TRUE	FALSE	63	TRUE	FALSE	FALSE	FALSE	FALSE	7	56.5	3.17	132.4	0.821087	51.7	2.93543	29.4927	2.67161	29586068	30104842	518774	29498829	30214457	715628
	14739.x3	SV0000530	SV0001453	DEL_3_2	9	Male	Deletion	Proband	Unknown	7	FALSE	FALSE	FALSE	FALSE	FALSE	TRUE	FALSE	63	TRUE	FALSE	FALSE	FALSE	FALSE	7	56.5	3.17	132.4	0.821087	51.7	2.93543	29.4927	2.67161	29586068	30104842	518774	29488112	30227809	739697
	14739.x3	SV0000530	SV0001453	DEL_3_3	9	Male	Deletion	Proband	Unknown	7	FALSE	FALSE	FALSE	FALSE	FALSE	TRUE	FALSE	63	TRUE	FALSE	FALSE	FALSE	FALSE	7	56.5	3.17	132.4	0.821087	51.7	2.93543	29.4927	2.67161	29586068	30104842	518774	29498829	30227504	728675
	14739.x3	SV0000530	SV0001453	DEL_3_4	9	Male	Deletion	Proband	Unknown	7	FALSE	FALSE	FALSE	FALSE	FALSE	TRUE	FALSE	63	TRUE	FALSE	FALSE	FALSE	FALSE	7	56.5	3.17	132.4	0.821087	51.7	2.93543	29.4927	2.67161	29586068	30104842	518774	ND	ND	ND
	14739.x3	SV0000530	SV0001453	DEL_3_5	9	Male	Deletion	Proband	Unknown	7	FALSE	FALSE	FALSE	FALSE	FALSE	TRUE	FALSE	63	TRUE	FALSE	FALSE	FALSE	FALSE	7	56.5	3.17	132.4	0.821087	51.7	2.93543	29.4927	2.67161	29586068	30104842	518774	ND	ND	ND
	14739.x3	SV0000530	SV0001453	DEL_3_7	9	Male	Deletion	Proband	Unknown	7	FALSE	FALSE	FALSE	FALSE	FALSE	TRUE	FALSE	63	TRUE	FALSE	FALSE	FALSE	FALSE	7	56.5	3.17	132.4	0.821087	51.7	2.93543	29.4927	2.67161	29586068	30104842	518774	ND	ND	ND
	14739.x3	SV0000530	SV0001453	DEL_3_8	9	Male	Deletion	Proband	Unknown	7	FALSE	FALSE	FALSE	FALSE	FALSE	TRUE	FALSE	63	TRUE	FALSE	FALSE	FALSE	FALSE	7	56.5	3.17	132.4	0.821087	51.7	2.93543	29.4927	2.67161	29586068	30104842	518774	ND	ND	ND
	14739.x3	SV0000530	SV0001453	DEL_3_9	9	Male	Deletion	Proband	Unknown	7	FALSE	FALSE	FALSE	FALSE	FALSE	TRUE	FALSE	63	TRUE	FALSE	FALSE	FALSE	FALSE	7	56.5	3.17	132.4	0.821087	51.7	2.93543	29.4927	2.67161	29586068	30104842	518774	ND	ND	ND
	14746.x8	SV0000537	SV0001495	DEL_4_1	11	Female	Deletion	Sibling	Inherited	9	TRUE	FALSE	TRUE	FALSE	FALSE	FALSE	FALSE	60	FALSE	FALSE	FALSE	FALSE	FALSE	9	52.4	0.17	133	-0.722772	36	0.470126	20.3516	1.14485	ND	ND	ND	29488112	30227809	739697
	14746.x8	SV0000537	SV0001495	DEL_4_2	11	Female	Deletion	Sibling	Inherited	9	TRUE	FALSE	TRUE	FALSE	FALSE	FALSE	FALSE	60	FALSE	FALSE	FALSE	FALSE	FALSE	9	52.4	0.17	133	-0.722772	36	0.470126	20.3516	1.14485	ND	ND	ND	29336028	30252460	916432
	14746.x8	SV0000537	SV0001495	DEL_4_3	11	Female	Deletion	Sibling	Inherited	9	TRUE	FALSE	TRUE	FALSE	FALSE	FALSE	FALSE	60	FALSE	FALSE	FALSE	FALSE	FALSE	9	52.4	0.17	133	-0.722772	36	0.470126	20.3516	1.14485	ND	ND	ND	ND	ND	ND
	14746.x8	SV0000537	SV0001495	DEL_4_5	11	Female	Deletion	Sibling	Inherited	9	TRUE	FALSE	TRUE	FALSE	FALSE	FALSE	FALSE	60	FALSE	FALSE	FALSE	FALSE	FALSE	9	52.4	0.17	133	-0.722772	36	0.470126	20.3516	1.14485	ND	ND	ND	ND	ND	ND
	14746.x8	SV0000537	SV0001495	DEL_4_6	11	Female	Deletion	Sibling	Inherited	9	TRUE	FALSE	TRUE	FALSE	FALSE	FALSE	FALSE	60	FALSE	FALSE	FALSE	FALSE	FALSE	9	52.4	0.17	133	-0.722772	36	0.470126	20.3516	1.14485	ND	ND	ND	ND	ND	ND
	14746.x8	SV0000537	SV0001495	DEL_4_7	11	Female	Deletion	Sibling	Inherited	9	TRUE	FALSE	TRUE	FALSE	FALSE	FALSE	FALSE	60	FALSE	FALSE	FALSE	FALSE	FALSE	9	52.4	0.17	133	-0.722772	36	0.470126	20.3516	1.14485	ND	ND	ND	ND	ND	ND
	14758.x3	SV0000525	SV0001473	DEL_5_7	7	Female	Deletion	Proband	Unknown	6	FALSE	FALSE	TRUE	TRUE	FALSE	FALSE	TRUE	71	FALSE	FALSE	FALSE	FALSE	FALSE	8	54	1.73	138	1.34699	31.3	0.8051	16.4356	0.226136	29563985	30066187	502202	29498829	30214457	715628
	14758.x3	SV0000525	SV0001473	DEL_5_8	7	Female	Deletion	Proband	Unknown	6	FALSE	FALSE	TRUE	TRUE	FALSE	FALSE	TRUE	71	FALSE	FALSE	FALSE	FALSE	FALSE	8	54	1.73	138	1.34699	31.3	0.8051	16.4356	0.226136	29563985	30066187	502202	29498829	30214457	715628
	14758.x3	SV0000525	SV0001473	DEL_5_9	7	Female	Deletion	Proband	Unknown	6	FALSE	FALSE	TRUE	TRUE	FALSE	FALSE	TRUE	71	FALSE	FALSE	FALSE	FALSE	FALSE	8	54	1.73	138	1.34699	31.3	0.8051	16.4356	0.226136	29563985	30066187	502202	29498829	30214457	715628
	14758.x3	SV0000525	SV0001473	DEL_5_10	7	Female	Deletion	Proband	Unknown	6	FALSE	FALSE	TRUE	TRUE	FALSE	FALSE	TRUE	71	FALSE	FALSE	FALSE	FALSE	FALSE	8	54	1.73	138	1.34699	31.3	0.8051	16.4356	0.226136	29563985	30066187	502202	ND	ND	ND
	14758.x3	SV0000525	SV0001473	DEL_5_11	7	Female	Deletion	Proband	Unknown	6	FALSE	FALSE	TRUE	TRUE	FALSE	FALSE	TRUE	71	FALSE	FALSE	FALSE	FALSE	FALSE	8	54	1.73	138	1.34699	31.3	0.8051	16.4356	0.226136	29563985	30066187	502202	ND	ND	ND
	14758.x3	SV0000525	R012280979	DEL_5_979	7	Female	Deletion	Proband	Unknown	6	FALSE	FALSE	TRUE	TRUE	FALSE	FALSE	TRUE	71	FALSE	FALSE	FALSE	FALSE	FALSE	8	54	1.73	138	1.34699	31.3	0.8051	16.4356	0.226136	29563985	30066187	502202	ND	ND	ND
	14758.x3	SV0000525	R012280980	DEL_5_980	7	Female	Deletion	Proband	Unknown	6	FALSE	FALSE	TRUE	TRUE	FALSE	FALSE	TRUE	71	FALSE	FALSE	FALSE	FALSE	FALSE	8	54	1.73	138	1.34699	31.3	0.8051	16.4356	0.226136	29563985	30066187	502202	ND	ND	ND
	14758.x3	SV0000525	R012280983	DEL_5_983	7	Female	Deletion	Proband	Unknown	6	FALSE	FALSE	TRUE	TRUE	FALSE	FALSE	TRUE	71	FALSE	FALSE	FALSE	FALSE	FALSE	8	54	1.73	138	1.34699	31.3	0.8051	16.4356	0.226136	29563985	30066187	502202	ND	ND	ND
	14763.x7	SV0000529	SV0001442	DEL_6_4	6	Male	Deletion	Proband	De Novo	5	FALSE	FALSE	TRUE	FALSE	FALSE	TRUE	FALSE	96	TRUE	FALSE	FALSE	FALSE	FALSE	5	51	-0.06	107.8	-0.520333	18.5	-0.148723	15.9197	0.411177	28949550	30104842	1155292	ND	ND	ND
	14763.x7	SV0000529	SV0001442	DEL_6_7	6	Male	Deletion	Proband	De Novo	5	FALSE	FALSE	TRUE	FALSE	FALSE	TRUE	FALSE	96	TRUE	FALSE	FALSE	FALSE	FALSE	5	51	-0.06	107.8	-0.520333	18.5	-0.148723	15.9197	0.411177	28949550	30104842	1155292	29425200	30214457	789257
	14763.x7	SV0000529	SV0001442	DEL_6_8	6	Male	Deletion	Proband	De Novo	5	FALSE	FALSE	TRUE	FALSE	FALSE	TRUE	FALSE	96	TRUE	FALSE	FALSE	FALSE	FALSE	5	51	-0.06	107.8	-0.520333	18.5	-0.148723	15.9197	0.411177	28949550	30104842	1155292	29498829	30214457	715628
	14763.x7	SV0000529	SV0001442	DEL_6_9	6	Male	Deletion	Proband	De Novo	5	FALSE	FALSE	TRUE	FALSE	FALSE	TRUE	FALSE	96	TRUE	FALSE	FALSE	FALSE	FALSE	5	51	-0.06	107.8	-0.520333	18.5	-0.148723	15.9197	0.411177	28949550	30104842	1155292	29425200	30214457	789257
	14765.x2	SV0000536	SV0001455	DEL_7_1	14	Male	Deletion	Proband	Unknown	12	FALSE	FALSE	TRUE	FALSE	TRUE	TRUE	FALSE	66	FALSE	FALSE	FALSE	FALSE	FALSE	12	56	1.31	138.6	-2.01243	47.6	0.381386	24.7788	1.63148	29550781	30108247	557466	29498829	30258250	759421
	14765.x2	SV0000536	SV0001455	DEL_7_2	14	Male	Deletion	Proband	Unknown	12	FALSE	FALSE	TRUE	FALSE	TRUE	TRUE	FALSE	66	FALSE	FALSE	FALSE	FALSE	FALSE	12	56	1.31	138.6	-2.01243	47.6	0.381386	24.7788	1.63148	29550781	30108247	557466	29498829	30214457	715628
	14765.x2	SV0000536	SV0001455	DEL_7_3	14	Male	Deletion	Proband	Unknown	12	FALSE	FALSE	TRUE	FALSE	TRUE	TRUE	FALSE	66	FALSE	FALSE	FALSE	FALSE	FALSE	12	56	1.31	138.6	-2.01243	47.6	0.381386	24.7788	1.63148	29550781	30108247	557466	29498829	30227809	728980
	14765.x2	SV0000536	SV0001455	DEL_7_4	14	Male	Deletion	Proband	Unknown	12	FALSE	FALSE	TRUE	FALSE	TRUE	TRUE	FALSE	66	FALSE	FALSE	FALSE	FALSE	FALSE	12	56	1.31	138.6	-2.01243	47.6	0.381386	24.7788	1.63148	29550781	30108247	557466	ND	ND	ND
	14781.x16	SV0000531	SV0001481	DEL_8_2	10	Male	Deletion	Proband	De Novo	8	FALSE	FALSE	TRUE	FALSE	FALSE	FALSE	FALSE	97	FALSE	FALSE	FALSE	FALSE	FALSE	10	56.5	2.35	140	-0.417817	40	0.613024	20.4082	1.12453	29528220	30098040	569820	29498829	30214457	715628
	14781.x16	SV0000531	SV0001481	DEL_8_3	10	Male	Deletion	Proband	De Novo	8	FALSE	FALSE	TRUE	FALSE	FALSE	FALSE	FALSE	97	FALSE	FALSE	FALSE	FALSE	FALSE	10	56.5	2.35	140	-0.417817	40	0.613024	20.4082	1.12453	29528220	30098040	569820	29488112	30214457	726345
	14781.x16	SV0000531	SV0001481	DEL_8_4	10	Male	Deletion	Proband	De Novo	8	FALSE	FALSE	TRUE	FALSE	FALSE	FALSE	FALSE	97	FALSE	FALSE	FALSE	FALSE	FALSE	10	56.5	2.35	140	-0.417817	40	0.613024	20.4082	1.12453	29528220	30098040	569820	29498829	30099396	600567
	14781.x16	SV0000531	SV0001481	DEL_8_9	10	Male	Deletion	Proband	De Novo	8	FALSE	FALSE	TRUE	FALSE	FALSE	FALSE	FALSE	97	FALSE	FALSE	FALSE	FALSE	FALSE	10	56.5	2.35	140	-0.417817	40	0.613024	20.4082	1.12453	29528220	30098040	569820	ND	ND	ND
	14799.x1	SV0000540	R012280984	DEL_9_984	14	Male	Deletion	Proband	De Novo	14	FALSE	FALSE	FALSE	TRUE	FALSE	FALSE	FALSE	122	TRUE	FALSE	FALSE	FALSE	FALSE	14	59.7	3.29	166.4	-0.133327	60.5	0.596226	21.8499	0.742752	29359834	30242073	882239	ND	ND	ND
	14799.x1	SV0000540	R012280986	DEL_9_986	14	Male	Deletion	Proband	De Novo	14	FALSE	FALSE	FALSE	TRUE	FALSE	FALSE	FALSE	122	TRUE	FALSE	FALSE	FALSE	FALSE	14	59.7	3.29	166.4	-0.133327	60.5	0.596226	21.8499	0.742752	29359834	30242073	882239	ND	ND	ND
	14799.x1	SV0000540	R012280987	DEL_9_987	14	Male	Deletion	Proband	De Novo	14	FALSE	FALSE	FALSE	TRUE	FALSE	FALSE	FALSE	122	TRUE	FALSE	FALSE	FALSE	FALSE	14	59.7	3.29	166.4	-0.133327	60.5	0.596226	21.8499	0.742752	29359834	30242073	882239	ND	ND	ND
	14824.x13	SV0000799	R012280989	DEL_10_989	14	Male	Deletion	Sibling	De Novo	14	FALSE	FALSE	TRUE	TRUE	FALSE	TRUE	FALSE	93	TRUE	FALSE	FALSE	FALSE	FALSE	14	58	2.17	159	-0.909879	56	0.285285	22.151	0.853048	ND	ND	ND	ND	ND	ND
	14824.x13	SV0000799	R012280991	DEL_10_991	14	Male	Deletion	Sibling	De Novo	14	FALSE	FALSE	TRUE	TRUE	FALSE	TRUE	FALSE	93	TRUE	FALSE	FALSE	FALSE	FALSE	14	58	2.17	159	-0.909879	56	0.285285	22.151	0.853048	ND	ND	ND	ND	ND	ND
	14824.x13	SV0000799	R012280993	DEL_10_993	14	Male	Deletion	Sibling	De Novo	14	FALSE	FALSE	TRUE	TRUE	FALSE	TRUE	FALSE	93	TRUE	FALSE	FALSE	FALSE	FALSE	14	58	2.17	159	-0.909879	56	0.285285	22.151	0.853048	ND	ND	ND	ND	ND	ND
	14723.x10	SV0000532	SV0001484	DUP_1_1	38	Male	Duplication	Father	De Novo	36	FALSE	FALSE	FALSE	FALSE	FALSE	FALSE	FALSE	118	FALSE	FALSE	TRUE	FALSE	FALSE	36	59	2.72	193	2.27908	86.6	1.15383	23.2489	0.0727979	ND	ND	ND	29606107	30097531	491424
	14723.x10	SV0000532	SV0001484	DUP_1_4	38	Male	Duplication	Father	De Novo	36	FALSE	FALSE	FALSE	FALSE	FALSE	FALSE	FALSE	118	FALSE	FALSE	TRUE	FALSE	FALSE	36	59	2.72	193	2.27908	86.6	1.15383	23.2489	0.0727979	ND	ND	ND	ND	ND	ND
	14723.x10	SV0000532	SV0001484	DUP_1_5	38	Male	Duplication	Father	De Novo	36	FALSE	FALSE	FALSE	FALSE	FALSE	FALSE	FALSE	118	FALSE	FALSE	TRUE	FALSE	FALSE	36	59	2.72	193	2.27908	86.6	1.15383	23.2489	0.0727979	ND	ND	ND	ND	ND	ND
	14723.x10	SV0000532	SV0001484	DUP_1_7	38	Male	Duplication	Father	De Novo	36	FALSE	FALSE	FALSE	FALSE	FALSE	FALSE	FALSE	118	FALSE	FALSE	TRUE	FALSE	FALSE	36	59	2.72	193	2.27908	86.6	1.15383	23.2489	0.0727979	ND	ND	ND	29604462	30080076	475614
	14723.x10	SV0000532	SV0001484	DUP_1_8	38	Male	Duplication	Father	De Novo	36	FALSE	FALSE	FALSE	FALSE	FALSE	FALSE	FALSE	118	FALSE	FALSE	TRUE	FALSE	FALSE	36	59	2.72	193	2.27908	86.6	1.15383	23.2489	0.0727979	ND	ND	ND	29425200	30080076	654876
	14723.x10	SV0000532	SV0001484	DUP_1_9	38	Male	Duplication	Father	De Novo	36	FALSE	FALSE	FALSE	FALSE	FALSE	FALSE	FALSE	118	FALSE	FALSE	TRUE	FALSE	FALSE	36	59	2.72	193	2.27908	86.6	1.15383	23.2489	0.0727979	ND	ND	ND	ND	ND	ND
	14723.x10	SV0000532	SV0001484	DUP_1_10	38	Male	Duplication	Father	De Novo	36	FALSE	FALSE	FALSE	FALSE	FALSE	FALSE	FALSE	118	FALSE	FALSE	TRUE	FALSE	FALSE	36	59	2.72	193	2.27908	86.6	1.15383	23.2489	0.0727979	ND	ND	ND	ND	ND	ND
	14723.x10	SV0000532	SV0001484	DUP_1_11	38	Male	Duplication	Father	De Novo	36	FALSE	FALSE	FALSE	FALSE	FALSE	FALSE	FALSE	118	FALSE	FALSE	TRUE	FALSE	FALSE	36	59	2.72	193	2.27908	86.6	1.15383	23.2489	0.0727979	ND	ND	ND	ND	ND	ND
	14756.x9	SV0000535	SV0001472	DUP_2_1	27	Female	Duplication	Mother	Unknown	26	FALSE	FALSE	FALSE	FALSE	FALSE	FALSE	FALSE	90	FALSE	FALSE	FALSE	FALSE	FALSE	26	55	0.62	160.6	-0.422568	105.2	2.34561	40.7873	2.15182	ND	ND	ND	29425200	30062816	637616
	14756.x9	SV0000535	SV0001472	DUP_2_2	27	Female	Duplication	Mother	Unknown	26	FALSE	FALSE	FALSE	FALSE	FALSE	FALSE	FALSE	90	FALSE	FALSE	FALSE	FALSE	FALSE	26	55	0.62	160.6	-0.422568	105.2	2.34561	40.7873	2.15182	ND	ND	ND	29425200	30073226	648026
	14756.x9	SV0000535	SV0001472	DUP_2_3	27	Female	Duplication	Mother	Unknown	26	FALSE	FALSE	FALSE	FALSE	FALSE	FALSE	FALSE	90	FALSE	FALSE	FALSE	FALSE	FALSE	26	55	0.62	160.6	-0.422568	105.2	2.34561	40.7873	2.15182	ND	ND	ND	29425200	30085908	660708
	14756.x9	SV0000535	SV0001472	DUP_2_4	27	Female	Duplication	Mother	Unknown	26	FALSE	FALSE	FALSE	FALSE	FALSE	FALSE	FALSE	90	FALSE	FALSE	FALSE	FALSE	FALSE	26	55	0.62	160.6	-0.422568	105.2	2.34561	40.7873	2.15182	ND	ND	ND	ND	ND	ND
	14756.x9	SV0000535	SV0001472	DUP_2_5	27	Female	Duplication	Mother	Unknown	26	FALSE	FALSE	FALSE	FALSE	FALSE	FALSE	FALSE	90	FALSE	FALSE	FALSE	FALSE	FALSE	26	55	0.62	160.6	-0.422568	105.2	2.34561	40.7873	2.15182	ND	ND	ND	ND	ND	ND
	14756.x9	SV0000535	SV0001472	DUP_2_6	27	Female	Duplication	Mother	Unknown	26	FALSE	FALSE	FALSE	FALSE	FALSE	FALSE	FALSE	90	FALSE	FALSE	FALSE	FALSE	FALSE	26	55	0.62	160.6	-0.422568	105.2	2.34561	40.7873	2.15182	ND	ND	ND	ND	ND	ND
	14756.x16	SV0000534	SV0001464	DUP_3_1	5	Female	Duplication	Proband	Inherited	3	FALSE	FALSE	TRUE	FALSE	FALSE	FALSE	FALSE	84	FALSE	FALSE	FALSE	FALSE	FALSE	3	47.5	-1.19	97.1	-0.529079	13.1	-1.36086	13.8942	-1.49988	29530197	30134432	604235	29425200	30085308	660108
	14756.x16	SV0000534	SV0001464	DUP_3_2	5	Female	Duplication	Proband	Inherited	3	FALSE	FALSE	TRUE	FALSE	FALSE	FALSE	FALSE	84	FALSE	FALSE	FALSE	FALSE	FALSE	3	47.5	-1.19	97.1	-0.529079	13.1	-1.36086	13.8942	-1.49988	29530197	30134432	604235	29559137	30059018	499881
	14756.x16	SV0000534	SV0001464	DUP_3_3	5	Female	Duplication	Proband	Inherited	3	FALSE	FALSE	TRUE	FALSE	FALSE	FALSE	FALSE	84	FALSE	FALSE	FALSE	FALSE	FALSE	3	47.5	-1.19	97.1	-0.529079	13.1	-1.36086	13.8942	-1.49988	29530197	30134432	604235	29901198	30052385	151187
	14756.x16	SV0000534	SV0001464	DUP_3_4	5	Female	Duplication	Proband	Inherited	3	FALSE	FALSE	TRUE	FALSE	FALSE	FALSE	FALSE	84	FALSE	FALSE	FALSE	FALSE	FALSE	3	47.5	-1.19	97.1	-0.529079	13.1	-1.36086	13.8942	-1.49988	29530197	30134432	604235	ND	ND	ND
	14756.x16	SV0000534	SV0001464	DUP_3_5	5	Female	Duplication	Proband	Inherited	3	FALSE	FALSE	TRUE	FALSE	FALSE	FALSE	FALSE	84	FALSE	FALSE	FALSE	FALSE	FALSE	3	47.5	-1.19	97.1	-0.529079	13.1	-1.36086	13.8942	-1.49988	29530197	30134432	604235	ND	ND	ND
	14756.x16	SV0000534	SV0001464	DUP_3_6	5	Female	Duplication	Proband	Inherited	3	FALSE	FALSE	TRUE	FALSE	FALSE	FALSE	FALSE	84	FALSE	FALSE	FALSE	FALSE	FALSE	3	47.5	-1.19	97.1	-0.529079	13.1	-1.36086	13.8942	-1.49988	29530197	30134432	604235	ND	ND	ND
