# Supplementary material for: 16p11.2 microdeletion imparts transcriptional alterations in human iPSC-derived models of early neural development
Source: eLife. 2020 Nov 10;9:e58178. doi: 10.7554/eLife.58178 (PMC7695459; doi:10.7554/eLife.58178)
Supplement: Supplementary file 3. — SNP array analysis revealed hiPSC-clone-specific CNVs throughout the genome. Their copy number, location, and size are listed. [file elife-58178-supp3.xlsx]

## Sheet: Table 3
	DEL_1_2				DEL_1_3				DEL_1_4				DEL_2_3	DEL_2_4	DEL_3_1				DEL_3_2				DEL_3_3				DEL_3_4	DEL_3_5	DEL_3_7	DEL_3_8	DEL_3_9	DEL_4_1				DEL_4_2				DEL_4_3				DEL_4_5	DEL_4_6	DEL_4_7	DEL_5_7
	Loss/Gain	Chr	Cytoband	Size(kb)	Loss/Gain	Chr	Cytoband	Size(kb)	Loss/Gain	Chr	Cytoband	Size(kb)	ND	ND	Loss/Gain	Chr	Cytoband	Size(kb)	Loss/Gain	Chr	Cytoband	Size(kb)	Loss/Gain	Chr	Cytoband	Size(kb)	ND	ND	ND	ND	ND	Loss/Gain	Chr	Cytoband	Size(kb)	Loss/Gain	Chr	Cytoband	Size(kb)	Loss/Gain	Chr	Cytoband	Size(kb)	ND	ND	ND	Loss/Gain	Chr	Cytoband
	Gain	1	p36.13	135	Gain	1	p31.3	204	Gain	1	p36.13	116			Gain	1	p36.33	466	Gain	1	p36.33	336	Gain	1	p36.33	466						Gain	1	p35.3	147	Loss	3	p12.3	200	Loss	3	p12.3	194				Gain	1	p36.33
	Loss	1	p33	127	Gain	2	q32.1	276	Loss	1	p36.12	231			Loss	1	p36.32	171	Loss	2	q31.3	137	Loss	1	p36.21	267						Loss	3	p12.3	105	Gain	3	q26.1	103	Gain	4	q13.2	111				Loss	1	p33
	Gain	1	p31.3	213	Gain	3	p12.3	217	Gain	1	p31.3	213			Loss	2	q31.3	137	Gain	3	q26.1	103	Loss	2	q31.3	137						Gain	3	q26.1	103	Gain	4	q13.2	120	Gain	4	q22.2	116				Gain	1	p31.3
	Gain	1	q25.3	216	Loss	3	p11.1	206	Gain	3	p12.3	154			Gain	2	q32.1	103	Gain	4	q13.2	191	Gain	3	p12.3	154						Gain	4	q13.2	114	Loss	7	q31.1	299	Loss	7	q31.1	299				Gain	2	p25.3
	Loss	1	q43	121	Gain	4	q13.2	111	Loss	3	p11.1	4637			Gain	3	p12.3	318	Gain	4	q22.1	312	Loss	3	p11.1	203						Loss	4	q34.1	211	Gain	7	q35	122	Gain	7	q35	122				Gain	2	p16.1
	Gain	2	p16.3	154	Loss	4	q13.2	112	Loss	5	p11	3273			Gain	3	q26.1	103	Loss	6	q11.1	116	Gain	3	q26.1	103						Loss	7	q11.21	213	Loss	9	p11.2	110	Gain	8	p23.1	644				Gain	2	p11.2
	Gain	2	q24.3	138	Gain	4	q22.1	741	Gain	6	q16.1	199			Gain	4	q13.2	111	Loss	8	p11.1	3154	Gain	3	q26.2	115						Loss	7	q31.1	301	Loss	14	q11.1	843	Loss	14	q11.1	969				Loss	2	p11.1
	Gain	2	q31.2	157	Gain	4	q35.1	224	Loss	7	p11.2	222			Gain	4	q22.1	946	Gain	11	q14.1	147	Gain	4	q13.2	189						Gain	7	q35	202	Loss	15	q11.2	1332	Loss	15	q11.2	1408				Gain	2	q13
	Gain	2	q32.1	276	Loss	5	p11	3262	Loss	7	p11.2	540			Gain	6	p12.1	170	Loss	14	q11.1	858	Gain	4	q22.1	593						Loss	9	p11.2	582	Gain	15	q21.3	147	Gain	15	q21.3	145				Gain	2	q22.3
	Gain	2	q37.3	113	Gain	6	q16.1	458	Loss	7	p11.1	3302			Loss	6	q11.1	116	Gain	14	q11.2	249	Loss	5	p11	3315						Loss	14	q11.1	1035	Loss	16	p11.2	916	Gain	16	p13.11	114				Gain	2	q24.3
	Gain	3	p24.3	110	Gain	6	q22.1	138	Loss	7	q11.21	222			Gain	6	q16.1	242	Loss	15	q11.2	171	Gain	5	q32	107						Gain	14	q11.2	166	Loss	17	q12	152	Loss	16	p11.2	611				Gain	2	q31.2
	Gain	3	p24.3	109	Loss	7	p11.2	126	Loss	7	q11.21	992			Gain	6	q25.3	137	Loss	15	q11.2	445	Loss	6	q11.1	131						Loss	15	q11.2	1408	Loss	21	p11.2	199	Loss	16	q23.1	128				Gain	2	q37.3
	Gain	3	p12.3	185	Loss	7	p11.1	3320	Loss	7	q22.2	125			Loss	7	p11.2	304	Loss	16	p11.2	740	Gain	6	q16.1	485						Gain	15	q21.3	137	Loss	22	q11.1	422	Loss	17	q12	154				Gain	3	p24.3
	Loss	3	p11.1	4640	Loss	7	q11.21	135	Gain	7	q34	153			Gain	7	q21.11	236	Loss	21	p11.2	219	Gain	7	p22.3	111						Loss	16	p11.2	740	Loss	22	q11.21	259	Loss	22	q11.1	422				Gain	3	p14.1
	Gain	3	q21.3	116	Loss	7	q11.21	153	Loss	8	p12	105			Gain	7	q21.11	150	Gain	X	q21.31	386	Loss	7	p11.2	309						Loss	17	q12	168					Loss	22	q11.21	131				Gain	3	p12.3
	Gain	4	q13.1	156	Loss	8	p11.1	3178	Loss	8	p11.1	3232			Gain	7	q21.11	189	Gain	X	q21.31	157	Gain	7	q21.11	217						Loss	21	p11.2	387												Loss	3	p11.1
	Gain	4	q13.2	109	Loss	8	q11.1	126	Loss	8	q11.1	133			Gain	7	q31.32	100					Gain	7	q31.32	180						Loss	22	q11.1	390												Gain	3	q21.3
	Loss	4	q13.2	120	Loss	11	p11.12	614	Gain	9	p21.3	719			Gain	7	q35	149					Gain	7	q35	149						Loss	22	q11.21	122												Gain	4	q13.2
	Gain	4	q22.1	270	Loss	11	p11.12	3419	Loss	11	p11.12	688			Loss	8	q11.1	179					Loss	11	p11.12	487																					Gain	4	q21.21
	Gain	4	q22.1	180	Loss	12	p11.1	139	Loss	11	p11.12	3417			Loss	10	q23.2	125					Gain	11	q14.1	147																					Gain	4	q22.1
	Gain	4	q22.2	118	Loss	12	p11.1	2104	Loss	12	p11.1	105			Loss	10	q23.31	454					Gain	13	q21.1	164																					Loss	5	p11
	Gain	4	q35.1	237	Gain	13	q14.3	140	Loss	12	p11.1	2109			Gain	11	q14.1	152					Loss	14	q11.1	949																					Gain	5	q13.2
	Loss	5	p11	3682	Loss	14	q11.1	927	Loss	14	q11.1	1198			Loss	14	q11.1	1087					Loss	14	q11.2	181																					Gain	5	q21.3
	Gain	5	q14.3	124	Gain	14	q11.2	103	Gain	14	q11.2	333			Gain	14	q11.2	106					Loss	15	q11.2	171																					Gain	5	q31.2
	Gain	5	q14.3	106	Gain	14	q11.2	127	Loss	15	q11.2	383			Loss	15	q11.2	171					Loss	15	q11.2	445																					Gain	5	q32
	Gain	5	q21.3	131	Loss	15	q11.2	1323	Loss	15	q11.2	937			Loss	15	q11.2	218					Loss	16	p11.2	729																					Gain	6	q16.1
	Gain	5	q32	102	Loss	15	q13.1	292	Loss	15	q11.2	254			Loss	15	q11.2	826					Loss	16	p11.1	136																					Gain	6	q22.1
	Gain	5	q32	108	Gain	15	q22.31	140	Loss	15	q13.1	299			Loss	16	p11.2	716					Loss	19	q13.2	106																					Gain	7	p21.3
	Gain	6	q16.1	458	Loss	16	p11.2	726	Loss	15	q21.3	104			Loss	16	p11.1	157					Gain	X	q21.31	142																					Loss	7	p11.2
	Gain	6	q22.1	162	Loss	17	q21.31	357	Gain	16	p13.11	162			Loss	17	q12	102					Gain	X	q21.31	178																					Loss	7	p11.2
	Gain	6	q25.3	129	Loss	19	p13.2	103	Loss	16	p11.2	716			Gain	18	q21.32	101																													Loss	7	p11.1
	Gain	6	q27	227	Loss	19	p13.12	126	Loss	17	p11.2	128			Loss	22	q11.1	390																													Loss	7	q11.22
	Gain	7	p15.1	143	Loss	19	q12	212	Loss	17	q21.31	357			Gain	X	q21.31	142																													Loss	7	q22.2
	Loss	7	p11.2	289	Loss	20	q11.1	110	Loss	17	q22	159			Gain	X	q21.31	189																													Gain	7	q31.32
	Loss	7	p11.2	489	Loss	21	q11.2	168	Loss	17	q23.2	124			Gain	X	q21.31	116																													Gain	7	q35
	Loss	7	p11.1	3320					Loss	19	p13.2	113			Gain	X	q21.32	118																													Loss	7	q36.1
	Loss	7	q11.21	1514					Loss	19	p13.12	131																																			Loss	8	p11.1
	Loss	7	q11.22	101					Loss	19	p12	8283																																			Loss	8	q11.1
	Gain	7	q21.11	410					Loss	20	p12.3	113																																			Loss	10	p11.1
	Gain	7	q31.32	207					Loss	20	p11.1	2032																																			Loss	11	p11.2
	Gain	8	p23.3	114					Loss	21	p11.1	3363																																			Loss	11	p11.12
	Loss	8	p11.1	3270					Gain	X	q21.31	132																																			Loss	11	p11.12
	Loss	8	q11.1	133																																											Gain	11	q23.2
	Loss	10	p11.21	192																																											Gain	11	q25
	Loss	10	p11.1	2884																																											Gain	12	p11.21
	Loss	11	p11.2	302																																											Loss	12	p11.1
	Loss	11	p11.12	1052																																											Loss	14	q11.1
	Loss	11	p11.12	3491																																											Loss	14	q11.1
	Gain	11	q14.3	142																																											Gain	14	q11.2
	Loss	12	p11.1	2361																																											Loss	15	q11.2
	Gain	13	q14.3	126																																											Loss	16	p12.3
	Gain	13	q34	185																																											Loss	16	p11.2
	Loss	14	q11.1	1198																																											Loss	16	p11.1
	Gain	14	q11.2	103																																											Gain	17	q21.31
	Gain	14	q11.2	334																																											Loss	18	p11.21
	Loss	14	q13.1	165																																											Loss	19	p13.2
	Loss	15	q11.2	1323																																											Loss	19	p13.12
	Loss	15	q11.2	358																																											Loss	19	p12
	Loss	15	q11.2	187																																											Loss	20	p12.3
	Loss	15	q13.1	292																																											Loss	20	p11.1
	Loss	16	p11.2	802																																											Loss	21	p11.2
	Loss	16	p11.1	182																																											Loss	22	q11.23
	Loss	17	q21.31	351																																											Loss	X	p22.11
	Loss	19	p13.2	103																																											Loss	X	p11.3
	Loss	19	p13.12	119																																											Loss	X	p11.22
	Loss	19	p13.12	126																																											Loss	X	p11.1
	Loss	19	p12	8390																																											Loss	X	q13.3
	Loss	20	p12.3	179																																											Loss	X	q24
	Loss	20	p11.1	2065																																											Loss	X	q25
	Loss	21	q11.2	168
	Loss	22	q11.1	635
[truncated: 106 more columns]
