# Supplementary material for: 16p11.2 microdeletion imparts transcriptional alterations in human iPSC-derived models of early neural development
Source: eLife. 2020 Nov 10;9:e58178. doi: 10.7554/eLife.58178 (PMC7695459; doi:10.7554/eLife.58178)
Supplement: Supplementary file 7. — Pathways as characterized as upregulated (‘na_pos’) within the set of genes that make up the modules blue, bisque4, salmon, and pink4. [file elife-58178-supp7.xlsx]

## Sheet: gsea_report_for_na_pos_15976204
	Supplemental Table 7
	Gene Set	Size	Enrichment Score	Normalized Enrichment Score	Nominal p-value	False Discovery Rate	Familywise-error Rate	Rank at Max	Leading Edge
	BIOLOGICAL_PROCESS%GOBP%GO:0008150	359	0.206181	2.71115	0	0.00917267	0.006	281	tags=56%, list=49%, signal=42%
	CELLULAR PROCESS%GOBP%GO:0009987	288	0.181666	2.51905	0	0.0172962	0.022	300	tags=61%, list=52%, signal=63%
	REGULATION OF CELLULAR PROCESS%GOBP%GO:0050794	216	0.188021	2.45794	0	0.0216519	0.041	319	tags=67%, list=55%, signal=93%
	BIOLOGICAL REGULATION%GOBP%GO:0065007	249	0.180918	2.42122	0.00170358	0.0205482	0.052	281	tags=59%, list=49%, signal=65%
	PROTEIN-CONTAINING COMPLEX SUBUNIT ORGANIZATION%GOBP%GO:0043933	19	0.462707	2.37624	0	0.0207089	0.066	259	tags=89%, list=45%, signal=157%
	REGULATION OF BIOLOGICAL PROCESS%GOBP%GO:0050789	230	0.175817	2.36782	0.00168067	0.0185782	0.071	450	tags=88%, list=78%, signal=239%
	NEGATIVE REGULATION OF SIGNALING%GOBP%GO:0023057	27	0.365679	2.1967	0	0.0581287	0.233	313	tags=89%, list=54%, signal=184%
	NEGATIVE REGULATION OF CELL COMMUNICATION%GOBP%GO:0010648	27	0.365679	2.19438	0.00176367	0.0516577	0.234	313	tags=89%, list=54%, signal=184%
	CELLULAR METABOLIC PROCESS%GOBP%GO:0044237	156	0.175955	2.12699	0.00341297	0.0697207	0.339	269	tags=59%, list=46%, signal=80%
	REGULATION OF CELL COMMUNICATION%GOBP%GO:0010646	76	0.222788	2.1191	0.00384615	0.0644949	0.348	316	tags=74%, list=55%, signal=141%
	REGULATION OF SIGNALING%GOBP%GO:0023051	76	0.222788	2.09255	0.00521739	0.0711939	0.401	316	tags=74%, list=55%, signal=141%
	ORGANIC CYCLIC COMPOUND METABOLIC PROCESS%GOBP%GO:1901360	76	0.21968	2.08037	0.00179533	0.071594	0.429	265	tags=64%, list=46%, signal=103%
	CELLULAR AROMATIC COMPOUND METABOLIC PROCESS%GOBP%GO:0006725	72	0.226946	2.07323	0.00534759	0.0688836	0.439	265	tags=65%, list=46%, signal=105%
	POSITIVE REGULATION OF BIOLOGICAL PROCESS%GOBP%GO:0048518	136	0.176601	2.06058	0.00537634	0.0686384	0.457	429	tags=88%, list=74%, signal=258%
	REGULATION OF RESPONSE TO STIMULUS%GOBP%GO:0048583	96	0.189268	2.0012	0.00907441	0.0904523	0.581	344	tags=75%, list=59%, signal=154%
	HETEROCYCLE BIOSYNTHETIC PROCESS%GOBP%GO:0018130	20	0.376152	1.99484	0.00776699	0.0881142	0.591	197	tags=70%, list=34%, signal=102%
	NEGATIVE REGULATION OF RESPONSE TO STIMULUS%GOBP%GO:0048585	35	0.29442	1.98533	0.00179211	0.0876433	0.609	353	tags=89%, list=61%, signal=213%
	NEGATIVE REGULATION OF SIGNAL TRANSDUCTION%GOBP%GO:0009968	24	0.349273	1.94625	0.00753296	0.103892	0.689	313	tags=88%, list=54%, signal=183%
	TRANSPORT%GOBP%GO:0006810	76	0.203251	1.94235	0.00176678	0.10041	0.694	259	tags=62%, list=45%, signal=97%
	AROMATIC COMPOUND BIOSYNTHETIC PROCESS%GOBP%GO:0019438	20	0.376152	1.93642	0.00594059	0.0989583	0.708	197	tags=70%, list=34%, signal=102%
	METABOLIC PROCESS%GOBP%GO:0008152	162	0.156575	1.93176	0.00829187	0.0967202	0.718	269	tags=57%, list=46%, signal=77%
	ION TRANSPORT%GOBP%GO:0006811	22	0.345941	1.92	0.00568182	0.0992408	0.742	231	tags=73%, list=40%, signal=116%
	GENE EXPRESSION (TRANSCRIPTION)%REACTOME%R-HSA-74160.7	39	0.262146	1.91323	0.0075188	0.0988089	0.756	276	tags=72%, list=48%, signal=128%
	HETEROCYCLE METABOLIC PROCESS%GOBP%GO:0046483	72	0.211191	1.90554	0.0087108	0.0996318	0.775	265	tags=64%, list=46%, signal=103%
	REGULATION OF METABOLIC PROCESS%GOBP%GO:0019222	144	0.158049	1.90491	0.0104167	0.095973	0.776	462	tags=92%, list=80%, signal=341%
	LOCALIZATION%GOBP%GO:0051179	104	0.182157	1.9028	0.00830565	0.0932357	0.781	300	tags=66%, list=52%, signal=113%
	ORGANIC CYCLIC COMPOUND BIOSYNTHETIC PROCESS%GOBP%GO:1901362	24	0.336145	1.89727	0.00189394	0.0921094	0.788	250	tags=75%, list=43%, signal=127%
	CELL COMMUNICATION%GOBP%GO:0007154	86	0.188354	1.89564	0.00707965	0.089982	0.794	340	tags=74%, list=59%, signal=154%
	NUCLEOBASE-CONTAINING COMPOUND METABOLIC PROCESS%GOBP%GO:0006139	67	0.212284	1.87606	0.00744879	0.0970352	0.833	265	tags=64%, list=46%, signal=105%
	REGULATION OF SIGNAL TRANSDUCTION%GOBP%GO:0009966	70	0.210903	1.87509	0.00543478	0.0943838	0.836	316	tags=73%, list=55%, signal=141%
	ESTABLISHMENT OF LOCALIZATION%GOBP%GO:0051234	76	0.203251	1.84835	0.0122807	0.106085	0.885	259	tags=62%, list=45%, signal=97%
	SIGNALING%GOBP%GO:0023052	85	0.184569	1.8289	0.0157068	0.114713	0.911	340	tags=74%, list=59%, signal=153%
	SIGNALING PATHWAYS%REACTOME DATABASE ID RELEASE 73%162582	52	0.229645	1.82795	0.0185874	0.111426	0.911	315	tags=75%, list=54%, signal=150%
	NUCLEOBASE-CONTAINING COMPOUND BIOSYNTHETIC PROCESS%GOBP%GO:0034654	19	0.359359	1.82604	0.0166976	0.109565	0.916	197	tags=68%, list=34%, signal=100%
	CELLULAR NITROGEN COMPOUND BIOSYNTHETIC PROCESS%GOBP%GO:0044271	24	0.322325	1.81268	0.0111111	0.114611	0.931	233	tags=71%, list=40%, signal=114%
	POSITIVE REGULATION OF CELLULAR PROCESS%GOBP%GO:0048522	125	0.158607	1.80968	0.01473	0.113566	0.931	429	tags=86%, list=74%, signal=262%
	RNA POLYMERASE II TRANSCRIPTION%REACTOME DATABASE ID RELEASE 73%73857	38	0.253868	1.79967	0.025	0.116498	0.939	276	tags=71%, list=48%, signal=127%
	REGULATION OF CELLULAR COMPONENT ORGANIZATION%GOBP%GO:0051128	45	0.233238	1.77786	0.0141593	0.127374	0.954	276	tags=69%, list=48%, signal=121%
	CELLULAR NITROGEN COMPOUND METABOLIC PROCESS%GOBP%GO:0034641	74	0.192707	1.77614	0.0127971	0.125213	0.955	327	tags=73%, list=56%, signal=146%
	REGULATION OF PRIMARY METABOLIC PROCESS%GOBP%GO:0080090	131	0.152734	1.77235	0.00988468	0.124741	0.961	462	tags=92%, list=80%, signal=351%
	PRIMARY METABOLIC PROCESS%GOBP%GO:0044238	151	0.146471	1.72935	0.0224525	0.149725	0.986	269	tags=57%, list=46%, signal=79%
	REGULATION OF MACROMOLECULE METABOLIC PROCESS%GOBP%GO:0060255	129	0.150438	1.71674	0.0202578	0.156234	0.991	462	tags=91%, list=80%, signal=352%
	REGULATION OF PROTEIN METABOLIC PROCESS%GOBP%GO:0051246	61	0.200014	1.71533	0.0218182	0.153727	0.992	344	tags=77%, list=59%, signal=170%
	REGULATION OF CELLULAR METABOLIC PROCESS%GOBP%GO:0031323	136	0.148949	1.71446	0.0267112	0.151148	0.992	462	tags=91%, list=80%, signal=345%
	ESTABLISHMENT OF PROTEIN LOCALIZATION%GOBP%GO:0045184	19	0.328952	1.71276	0.023166	0.148948	0.992	275	tags=79%, list=47%, signal=145%
	REGULATION OF NITROGEN COMPOUND METABOLIC PROCESS%GOBP%GO:0051171	128	0.149263	1.70931	0.034965	0.148498	0.993	462	tags=91%, list=80%, signal=352%
	POSITIVE REGULATION OF CELLULAR COMPONENT ORGANIZATION%GOBP%GO:0051130	19	0.337388	1.70888	0.0208729	0.14557	0.993	300	tags=84%, list=52%, signal=169%
	NITROGEN COMPOUND METABOLIC PROCESS%GOBP%GO:0006807	145	0.14346	1.69125	0.0283688	0.156743	0.994	327	tags=67%, list=56%, signal=115%
	REGULATION OF BIOLOGICAL QUALITY%GOBP%GO:0065008	77	0.181037	1.67114	0.034296	0.170478	0.997	414	tags=87%, list=72%, signal=265%
	CELLULAR MACROMOLECULE METABOLIC PROCESS%GOBP%GO:0044260	101	0.162105	1.67107	0.0284192	0.167167	0.997	269	tags=59%, list=46%, signal=92%
	PHOSPHORUS METABOLIC PROCESS%GOBP%GO:0006793	33	0.250613	1.67094	0.0331492	0.163981	0.997	269	tags=70%, list=46%, signal=123%
	ORGANIC SUBSTANCE METABOLIC PROCESS%GOBP%GO:0071704	155	0.136611	1.66325	0.0438597	0.16698	0.998	269	tags=56%, list=46%, signal=77%
	MULTI-ORGANISM PROCESS%GOBP%GO:0051704	22	0.297422	1.66168	0.028169	0.164622	0.998	335	tags=86%, list=58%, signal=197%
	SIGNAL TRANSDUCTION%GOBP%GO:0007165	79	0.174844	1.65893	0.0307692	0.163631	0.998	347	tags=75%, list=60%, signal=161%
	PROTEOLYSIS%GOBP%GO:0006508	24	0.291363	1.64811	0.040293	0.169837	0.999	345	tags=88%, list=60%, signal=208%
	REGULATION OF INTRACELLULAR SIGNAL TRANSDUCTION%GOBP%GO:1902531	43	0.22454	1.64528	0.043088	0.168979	0.999	339	tags=79%, list=59%, signal=177%
	PHOSPHATE-CONTAINING COMPOUND METABOLIC PROCESS%GOBP%GO:0006796	33	0.250613	1.64358	0.0391459	0.16736	0.999	269	tags=70%, list=46%, signal=123%
	NUCLEIC ACID METABOLIC PROCESS%GOBP%GO:0090304	51	0.20841	1.62638	0.030303	0.180505	0.999	233	tags=59%, list=40%, signal=90%
	PEPTIDE TRANSPORT%GOBP%GO:0015833	18	0.316602	1.61539	0.0327553	0.186738	0.999	275	tags=78%, list=47%, signal=144%
	ORGANIC SUBSTANCE CATABOLIC PROCESS%GOBP%GO:1901575	36	0.230421	1.58611	0.0506329	0.210335	0.999	327	tags=78%, list=56%, signal=168%
	CELLULAR RESPONSE TO STIMULUS%GOBP%GO:0051716	114	0.143828	1.58016	0.0515098	0.212263	0.999	316	tags=66%, list=55%, signal=116%
	NEGATIVE REGULATION OF CELLULAR PROCESS%GOBP%GO:0048523	91	0.150494	1.56997	0.0509666	0.218868	0.999	461	tags=92%, list=80%, signal=382%
	PROTEIN TRANSPORT%GOBP%GO:0015031	18	0.316602	1.56694	0.0488281	0.218359	0.999	275	tags=78%, list=47%, signal=144%
	GENERIC TRANSCRIPTION PATHWAY%REACTOME%R-HSA-212436.11	33	0.240144	1.56584	0.057554	0.216184	0.999	170	tags=52%, list=29%, signal=69%
	RNA METABOLIC PROCESS%GOBP%GO:0016070	38	0.221374	1.54958	0.0659134	0.22938	1	233	tags=61%, list=40%, signal=95%
	CELLULAR MACROMOLECULE BIOSYNTHETIC PROCESS%GOBP%GO:0034645	32	0.239735	1.54229	0.0635209	0.233566	1	233	tags=63%, list=40%, signal=99%
	RESPONSE TO EXTERNAL STIMULUS%GOBP%GO:0009605	21	0.290498	1.54047	0.0469925	0.231983	1	335	tags=86%, list=58%, signal=196%
	REGULATION OF TRANSPORT%GOBP%GO:0051049	36	0.222712	1.54009	0.0457746	0.229208	1	300	tags=72%, list=52%, signal=141%
	PHOSPHORYLATION%GOBP%GO:0016310	17	0.312057	1.52795	0.0652985	0.238023	1	269	tags=76%, list=46%, signal=139%
	MACROMOLECULE CATABOLIC PROCESS%GOBP%GO:0009057	21	0.281312	1.51241	0.0729927	0.253365	1	367	tags=90%, list=63%, signal=238%
	CATABOLIC PROCESS%GOBP%GO:0009056	40	0.211048	1.49784	0.059246	0.266486	1	380	tags=85%, list=66%, signal=230%
	TRANSMEMBRANE TRANSPORT%GOBP%GO:0055085	16	0.313186	1.49089	0.0763501	0.271248	1	225	tags=69%, list=39%, signal=109%
	NEURON DIFFERENTIATION%GOBP%GO:0030182	17	0.30925	1.48348	0.0759494	0.276015	1	170	tags=59%, list=29%, signal=81%
	ORGANELLE ORGANIZATION%GOBP%GO:0006996	55	0.177994	1.4757	0.0734767	0.281389	1	319	tags=71%, list=55%, signal=143%
	INTRACELLULAR TRANSPORT%GOBP%GO:0046907	27	0.244738	1.47139	0.0812274	0.283122	1	275	tags=70%, list=47%, signal=128%
	CELL CYCLE PROCESS%GOBP%GO:0022402	17	0.299077	1.47117	0.0808824	0.27963	1	276	tags=76%, list=48%, signal=142%
	CELLULAR COMPONENT BIOGENESIS%GOBP%GO:0044085	43	0.199715	1.46952	0.0858144	0.278063	1	259	tags=63%, list=45%, signal=105%
	PROTEIN LOCALIZATION%GOBP%GO:0008104	34	0.219652	1.46065	0.0822669	0.285381	1	291	tags=71%, list=50%, signal=134%
	NERVOUS SYSTEM DEVELOPMENT%GOBP%GO:0007399	36	0.214526	1.46047	0.0783582	0.282043	1	335	tags=78%, list=58%, signal=173%
	GENERATION OF NEURONS%GOBP%GO:0048699	25	0.248798	1.44516	0.0931099	0.297958	1	281	tags=72%, list=49%, signal=134%
	ESTABLISHMENT OF LOCALIZATION IN CELL%GOBP%GO:0051649	27	0.244738	1.44266	0.0998152	0.297723	1	275	tags=70%, list=47%, signal=128%
	CELLULAR COMPONENT ASSEMBLY%GOBP%GO:0022607	36	0.208517	1.44254	0.0823117	0.294166	1	259	tags=64%, list=45%, signal=108%
	INTRACELLULAR PROTEIN TRANSPORT%GOBP%GO:0006886	17	0.302816	1.44072	0.0882353	0.292822	1	275	tags=76%, list=47%, signal=141%
	INTRACELLULAR SIGNAL TRANSDUCTION%GOBP%GO:0035556	24	0.256768	1.44047	0.0956848	0.289667	1	269	tags=71%, list=46%, signal=127%
	REGULATION OF GENE EXPRESSION%GOBP%GO:0010468	89	0.145804	1.43977	0.120354	0.287099	1	462	tags=92%, list=80%, signal=386%
	REGULATION OF CELLULAR PROTEIN METABOLIC PROCESS%GOBP%GO:0032268	56	0.175774	1.43922	0.0979667	0.28444	1	344	tags=75%, list=59%, signal=167%
	CELL CYCLE%GOBP%GO:0007049	17	0.299077	1.43494	0.0849421	0.286268	1	276	tags=76%, list=48%, signal=142%
	REGULATION OF BIOSYNTHETIC PROCESS%GOBP%GO:0009889	86	0.141619	1.43031	0.0892857	0.288806	1	462	tags=92%, list=80%, signal=387%
	CELLULAR MACROMOLECULE CATABOLIC PROCESS%GOBP%GO:0044265	20	0.275952	1.42797	0.098646	0.288538	1	367	tags=90%, list=63%, signal=237%
	REGULATION OF HYDROLASE ACTIVITY%GOBP%GO:0051336	16	0.300821	1.42788	0.098646	0.285369	1	267	tags=75%, list=46%, signal=135%
	MACROMOLECULE BIOSYNTHETIC PROCESS%GOBP%GO:0009059	35	0.214514	1.42339	0.0933852	0.287605	1	233	tags=60%, list=40%, signal=94%
	PROGRAMMED CELL DEATH%GOBP%GO:0012501	15	0.304062	1.4225	0.0823755	0.285295	1	178	tags=60%, list=31%, signal=84%
	REGULATION OF NUCLEOBASE-CONTAINING COMPOUND METABOLIC PROCESS%GOBP%GO:0019219	87	0.143161	1.40819	0.119718	0.298636	1	462	tags=92%, list=80%, signal=387%
	REGULATION OF RNA METABOLIC PROCESS%GOBP%GO:0051252	79	0.146839	1.40815	0.120275	0.295492	1	476	tags=95%, list=82%, signal=461%
	MACROMOLECULE METABOLIC PROCESS%GOBP%GO:0043170	124	0.123968	1.40772	0.101222	0.292897	1	226	tags=48%, list=39%, signal=62%
	REGULATION OF CELL CYCLE%GOBP%GO:0051726	20	0.264316	1.40516	0.0992366	0.293286	1	231	tags=65%, list=40%, signal=104%
	RESPONSE TO STIMULUS%GOBP%GO:0050896	139	0.121741	1.4046	0.0957447	0.290831	1	340	tags=68%, list=59%, signal=124%
	REGULATION OF CELLULAR BIOSYNTHETIC PROCESS%GOBP%GO:0031326	86	0.141619	1.40268	0.118044	0.290059	1	462	tags=92%, list=80%, signal=387%
	PLASMA MEMBRANE BOUNDED CELL PROJECTION ORGANIZATION%GOBP%GO:0120036	19	0.275541	1.39738	0.123162	0.293327	1	335	tags=84%, list=58%, signal=193%
	CELL DEATH%GOBP%GO:0008219	15	0.304062	1.38844	0.130518	0.302027	1	178	tags=60%, list=31%, signal=84%
	CELLULAR CATABOLIC PROCESS%GOBP%GO:0044248	38	0.202055	1.38372	0.128107	0.304935	1	380	tags=84%, list=66%, signal=229%
	CELL PROJECTION ORGANIZATION%GOBP%GO:0030030	19	0.275541	1.38141	0.153137	0.304868	1	335	tags=84%, list=58%, signal=193%
	IMMUNE SYSTEM%REACTOME%R-HSA-168256.7	41	0.188894	1.37272	0.118613	0.311816	1	338	tags=76%, list=58%, signal=169%
	NEUROGENESIS%GOBP%GO:0022008	27	0.232851	1.37226	0.13197	0.309206	1	281	tags=70%, list=49%, signal=130%
	NUCLEOBASE-CONTAINING SMALL MOLECULE METABOLIC PROCESS%GOBP%GO:0055086	18	0.281646	1.36969	0.140927	0.309196	1	294	tags=78%, list=51%, signal=153%
	MACROMOLECULE LOCALIZATION%GOBP%GO:0033036	40	0.19156	1.3649	0.136691	0.312684	1	275	tags=65%, list=47%, signal=115%
	NEGATIVE REGULATION OF BIOLOGICAL PROCESS%GOBP%GO:0048519	102	0.132699	1.36237	0.130662	0.313197	1	476	tags=93%, list=82%, signal=431%
	ORGANIC SUBSTANCE TRANSPORT%GOBP%GO:0071702	30	0.215167	1.3487	0.130742	0.326698	1	251	tags=63%, list=43%, signal=106%
	PROTEOLYSIS INVOLVED IN CELLULAR PROTEIN CATABOLIC PROCESS%GOBP%GO:0051603	16	0.289087	1.34495	0.139847	0.328336	1	344	tags=88%, list=59%, signal=210%
	REGULATION OF PROTEIN MODIFICATION PROCESS%GOBP%GO:0031399	42	0.184534	1.34412	0.132855	0.326379	1	344	tags=76%, list=59%, signal=174%
	REGULATION OF MACROMOLECULE BIOSYNTHETIC PROCESS%GOBP%GO:0010556	82	0.135959	1.33706	0.16094	0.332746	1	462	tags=91%, list=80%, signal=389%
	RESPONSE TO CHEMICAL%GOBP%GO:0042221	61	0.153437	1.33695	0.132867	0.329967	1	340	tags=72%, list=59%, signal=156%
	POSITIVE REGULATION OF METABOLIC PROCESS%GOBP%GO:0009893	91	0.130742	1.33464	0.150278	0.330064	1	427	tags=85%, list=74%, signal=272%
	ORGANOPHOSPHATE METABOLIC PROCESS%GOBP%GO:0019637	15	0.295932	1.32536	0.145283	0.339101	1	259	tags=73%, list=45%, signal=129%
	POSITIVE REGULATION OF IMMUNE SYSTEM PROCESS%GOBP%GO:0002684	20	0.255814	1.31222	0.170909	0.354307	1	435	tags=100%, list=75%, signal=388%
	POSITIVE REGULATION OF PROTEIN METABOLIC PROCESS%GOBP%GO:0051247	44	0.181121	1.31212	0.145283	0.351305	1	287	tags=66%, list=50%, signal=121%
	NEGATIVE REGULATION OF MACROMOLECULE METABOLIC PROCESS%GOBP%GO:0010605	47	0.167687	1.30719	0.164486	0.354536	1	368	tags=79%, list=64%, signal=198%
	MACROMOLECULE MODIFICATION%GOBP%GO:0043412	67	0.147579	1.30035	0.181329	0.360836	1	316	tags=67%, list=55%, signal=131%
	GENE EXPRESSION%GOBP%GO:0010467	35	0.192411	1.29505	0.152216	0.365204	1	425	tags=91%, list=73%, signal=323%
	REGULATION OF ORGANELLE ORGANIZATION%GOBP%GO:0033043	20	0.243251	1.29407	0.175097	0.363587	1	300	tags=75%, list=52%, signal=150%
	POSITIVE REGULATION OF RESPONSE TO STIMULUS%GOBP%GO:0048584	50	0.163606	1.28907	0.170213	0.367534	1	435	tags=90%, list=75%, signal=331%
	DISEASE%REACTOME DATABASE ID RELEASE 73%1643685	28	0.210456	1.28669	0.158379	0.367618	1	300	tags=71%, list=52%, signal=141%
	POSITIVE REGULATION OF NITROGEN COMPOUND METABOLIC PROCESS%GOBP%GO:0051173	81	0.13474	1.28488	0.186529	0.367303	1	427	tags=85%, list=74%, signal=279%
	REGULATION OF TRANSCRIPTION, DNA-TEMPLATED%GOBP%GO:0006355	72	0.13922	1.2764	0.185185	0.376106	1	476	tags=94%, list=82%, signal=465%
	PROTEIN MODIFICATION BY SMALL PROTEIN CONJUGATION OR REMOVAL%GOBP%GO:0070647	24	0.22737	1.27399	0.185255	0.376494	1	310	tags=75%, list=54%, signal=155%
	MOVEMENT OF CELL OR SUBCELLULAR COMPONENT%GOBP%GO:0006928	26	0.216198	1.27315	0.191606	0.374371	1	349	tags=81%, list=60%, signal=194%
	CELLULAR LOCALIZATION%GOBP%GO:0051641	41	0.17497	1.27306	0.177165	0.371509	1	275	tags=63%, list=47%, signal=112%
	REGULATION OF CELLULAR MACROMOLECULE BIOSYNTHETIC PROCESS%GOBP%GO:2000112	81	0.134649	1.271	0.17762	0.371423	1	476	tags=94%, list=82%, signal=454%
	REPRODUCTIVE PROCESS%GOBP%GO:0022414	15	0.27407	1.26886	0.180934	0.371448	1	310	tags=80%, list=54%, signal=168%
	POSITIVE REGULATION OF MACROMOLECULE METABOLIC PROCESS%GOBP%GO:0010604	81	0.13474	1.26875	0.166058	0.368727	1	427	tags=85%, list=74%, signal=279%
	REGULATION OF DEVELOPMENTAL PROCESS%GOBP%GO:0050793	44	0.172508	1.26821	0.188679	0.366722	1	279	tags=64%, list=48%, signal=113%
	REGULATION OF NUCLEIC ACID-TEMPLATED TRANSCRIPTION%GOBP%GO:1903506	72	0.13922	1.26774	0.20709	0.364699	1	476	tags=94%, list=82%, signal=465%
	PROTEIN MODIFICATION PROCESS%GOBP%GO:0036211	59	0.152559	1.26665	0.185792	0.363365	1	316	tags=68%, list=55%, signal=134%
	CELLULAR PROTEIN MODIFICATION PROCESS%GOBP%GO:0006464	59	0.152559	1.26198	0.190893	0.367215	1	316	tags=68%, list=55%, signal=134%
	CARBOHYDRATE DERIVATIVE METABOLIC PROCESS%GOBP%GO:1901135	30	0.20249	1.25946	0.17803	0.367887	1	277	tags=67%, list=48%, signal=121%
	REGULATION OF RNA BIOSYNTHETIC PROCESS%GOBP%GO:2001141	72	0.13922	1.25669	0.217391	0.368894	1	476	tags=94%, list=82%, signal=465%
	CELLULAR PROTEIN CATABOLIC PROCESS%GOBP%GO:0044257	17	0.256058	1.252	0.184211	0.371999	1	367	tags=88%, list=63%, signal=234%
	PROTEIN CATABOLIC PROCESS%GOBP%GO:0030163	17	0.256058	1.25074	0.215649	0.371024	1	367	tags=88%, list=63%, signal=234%
	ORGANONITROGEN COMPOUND CATABOLIC PROCESS%GOBP%GO:1901565	30	0.20068	1.24542	0.204797	0.375702	1	412	tags=90%, list=71%, signal=296%
	CELLULAR MACROMOLECULE LOCALIZATION%GOBP%GO:0070727	29	0.200982	1.241	0.206107	0.37921	1	291	tags=69%, list=50%, signal=132%
	REGULATION OF CELL DEATH%GOBP%GO:0010941	30	0.193517	1.23826	0.222628	0.380359	1	435	tags=93%, list=75%, signal=356%
	METABOLISM OF LIPIDS%REACTOME%R-HSA-556833.7	15	0.26638	1.23464	0.216758	0.38247	1	353	tags=87%, list=61%, signal=216%
	NEGATIVE REGULATION OF PROTEIN METABOLIC PROCESS%GOBP%GO:0051248	17	0.254634	1.2292	0.227778	0.38761	1	368	tags=88%, list=64%, signal=235%
	AMIDE TRANSPORT%GOBP%GO:0042886	20	0.237498	1.22234	0.201852	0.393973	1	275	tags=70%, list=47%, signal=129%
	REPRODUCTION%GOBP%GO:0000003	15	0.27407	1.22164	0.224265	0.392345	1	310	tags=80%, list=54%, signal=168%
	SMALL MOLECULE METABOLIC PROCESS%GOBP%GO:0044281	39	0.171127	1.2214	0.218695	0.389966	1	326	tags=72%, list=56%, signal=153%
	CELLULAR PROTEIN LOCALIZATION%GOBP%GO:0034613	29	0.200982	1.21818	0.217557	0.391658	1	291	tags=69%, list=50%, signal=132%
	POSITIVE REGULATION OF CELLULAR METABOLIC PROCESS%GOBP%GO:0031325	87	0.121465	1.21695	0.221402	0.390643	1	427	tags=84%, list=74%, signal=272%
	CELLULAR COMPONENT ORGANIZATION%GOBP%GO:0016043	84	0.122676	1.21312	0.217153	0.392801	1	300	tags=62%, list=52%, signal=110%
	CELLULAR COMPONENT ORGANIZATION OR BIOGENESIS%GOBP%GO:0071840	91	0.120135	1.21257	0.228223	0.390919	1	300	tags=62%, list=52%, signal=108%
	CELLULAR BIOSYNTHETIC PROCESS%GOBP%GO:0044249	50	0.155747	1.21151	0.219601	0.389706	1	233	tags=54%, list=40%, signal=83%
	CELLULAR PROTEIN METABOLIC PROCESS%GOBP%GO:0044267	68	0.136723	1.20244	0.21978	0.399627	1	316	tags=66%, list=55%, signal=129%
	CELL SURFACE RECEPTOR SIGNALING PATHWAY%GOBP%GO:0007166	33	0.184745	1.20085	0.234657	0.399204	1	340	tags=76%, list=59%, signal=173%
	REGULATION OF IMMUNE SYSTEM PROCESS%GOBP%GO:0002682	32	0.186393	1.19404	0.228361	0.406491	1	441	tags=94%, list=76%, signal=372%
	LOCOMOTION%GOBP%GO:0040011	25	0.20773	1.19291	0.230056	0.40565	1	349	tags=80%, list=60%, signal=193%
	NEGATIVE REGULATION OF METABOLIC PROCESS%GOBP%GO:0009892	58	0.142475	1.18627	0.235401	0.412273	1	396	tags=81%, list=68%, signal=231%
	POSITIVE REGULATION OF CELLULAR PROTEIN METABOLIC PROCESS%GOBP%GO:0032270	41	0.159366	1.18422	0.229779	0.412096	1	340	tags=73%, list=59%, signal=165%
	BIOSYNTHETIC PROCESS%GOBP%GO:0009058	53	0.143654	1.17268	0.251838	0.426051	1	233	tags=53%, list=40%, signal=80%
	SYSTEM PROCESS%GOBP%GO:0003008	21	0.219203	1.16823	0.251474	0.429723	1	102	tags=38%, list=18%, signal=45%
	REGULATION OF LOCALIZATION%GOBP%GO:0032879	56	0.141168	1.16823	0.26738	0.427047	1	332	tags=70%, list=57%, signal=147%
	NEGATIVE REGULATION OF CELLULAR METABOLIC PROCESS%GOBP%GO:0031324	53	0.144409	1.15997	0.257627	0.436994	1	470	tags=94%, list=81%, signal=455%
	NEGATIVE REGULATION OF NITROGEN COMPOUND METABOLIC PROCESS%GOBP%GO:0051172	46	0.156515	1.15838	0.267658	0.4369	1	470	tags=96%, list=81%, signal=468%
	ORGANIC SUBSTANCE BIOSYNTHETIC PROCESS%GOBP%GO:1901576	53	0.143654	1.15222	0.265455	0.443069	1	233	tags=53%, list=40%, signal=80%
	NEGATIVE REGULATION OF CELLULAR PROTEIN METABOLIC PROCESS%GOBP%GO:0032269	16	0.246743	1.15081	0.284404	0.442289	1	368	tags=88%, list=64%, signal=233%
	POSITIVE REGULATION OF TRANSPORT%GOBP%GO:0051050	19	0.230712	1.14937	0.276438	0.441895	1	300	tags=74%, list=52%, signal=148%
	REGULATION OF IMMUNE RESPONSE%GOBP%GO:0050776	21	0.208042	1.13437	0.311567	0.461574	1	435	tags=95%, list=75%, signal=369%
	CELL DEVELOPMENT%GOBP%GO:0048468	25	0.194946	1.13419	0.274102	0.45899	1	470	tags=100%, list=81%, signal=508%
	NITROGEN COMPOUND TRANSPORT%GOBP%GO:0071705	26	0.195222	1.12432	0.311072	0.470941	1	251	tags=62%, list=43%, signal=104%
	ORGANONITROGEN COMPOUND METABOLIC PROCESS%GOBP%GO:1901564	101	0.111656	1.12275	0.311847	0.470554	1	316	tags=63%, list=55%, signal=115%
	IMMUNE EFFECTOR PROCESS%GOBP%GO:0002252	15	0.241471	1.11933	0.286853	0.473162	1	252	tags=67%, list=44%, signal=115%
	CYTOSKELETON ORGANIZATION%GOBP%GO:0007010	15	0.243322	1.11548	0.306324	0.476339	1	251	tags=67%, list=43%, signal=115%
	SECRETION BY CELL%GOBP%GO:0032940	15	0.24451	1.11216	0.294355	0.478391	1	174	tags=53%, list=30%, signal=74%
	CELLULAR RESPONSE TO DNA DAMAGE STIMULUS%GOBP%GO:0006974	16	0.236835	1.10611	0.321839	0.484411	1	231	tags=63%, list=40%, signal=101%
	REGULATION OF PROGRAMMED CELL DEATH%GOBP%GO:0043067	27	0.18496	1.09282	0.33574	0.501947	1	435	tags=93%, list=75%, signal=355%
	REGULATION OF CATABOLIC PROCESS%GOBP%GO:0009894	16	0.238135	1.09041	0.335227	0.502727	1	373	tags=88%, list=64%, signal=239%
	REGULATION OF APOPTOTIC PROCESS%GOBP%GO:0042981	27	0.18496	1.08931	0.344444	0.501547	1	435	tags=93%, list=75%, signal=355%
	DNA METABOLIC PROCESS%GOBP%GO:0006259	18	0.220151	1.08844	0.32216	0.500114	1	265	tags=67%, list=46%, signal=119%
	POSITIVE REGULATION OF SIGNALING%GOBP%GO:0023056	41	0.149059	1.08754	0.333959	0.498607	1	429	tags=88%, list=74%, signal=315%
	REGULATION OF CELLULAR COMPONENT BIOGENESIS%GOBP%GO:0044087	15	0.235714	1.08346	0.341651	0.501823	1	178	tags=53%, list=31%, signal=75%
	POSITIVE REGULATION OF RNA METABOLIC PROCESS%GOBP%GO:0051254	42	0.146887	1.08013	0.361062	0.504668	1	459	tags=93%, list=79%, signal=416%
	NEGATIVE REGULATION OF NUCLEOBASE-CONTAINING COMPOUND METABOLIC PROCESS%GOBP%GO:0045934	31	0.163911	1.07372	0.359168	0.512462	1	470	tags=97%, list=81%, signal=487%
	GPCR DOWNSTREAM SIGNALLING%REACTOME DATABASE ID RELEASE 73%388396	22	0.193504	1.0732	0.355388	0.510416	1	315	tags=73%, list=54%, signal=153%
	POSITIVE REGULATION OF CELLULAR BIOSYNTHETIC PROCESS%GOBP%GO:0031328	49	0.137601	1.07057	0.353357	0.511957	1	459	tags=92%, list=79%, signal=406%
	NEGATIVE REGULATION OF BIOSYNTHETIC PROCESS%GOBP%GO:0009890	32	0.16523	1.07041	0.35272	0.509353	1	470	tags=97%, list=81%, signal=486%
	NEGATIVE REGULATION OF CELLULAR BIOSYNTHETIC PROCESS%GOBP%GO:0031327	32	0.16523	1.06083	0.362799	0.521697	1	470	tags=97%, list=81%, signal=486%
	POSITIVE REGULATION OF BIOSYNTHETIC PROCESS%GOBP%GO:0009891	49	0.137601	1.05984	0.365455	0.520574	1	459	tags=92%, list=79%, signal=406%
	G PROTEIN-COUPLED RECEPTOR SIGNALING PATHWAY%GOBP%GO:0007186	19	0.206289	1.05847	0.363465	0.519864	1	315	tags=74%, list=54%, signal=156%
	CELLULAR DEVELOPMENTAL PROCESS%GOBP%GO:0048869	63	0.123467	1.05563	0.408163	0.521375	1	470	tags=92%, list=81%, signal=436%
	POSITIVE REGULATION OF CELL COMMUNICATION%GOBP%GO:0010647	41	0.149059	1.05357	0.394595	0.521701	1	429	tags=88%, list=74%, signal=315%
	RESPONSE TO ABIOTIC STIMULUS%GOBP%GO:0009628	15	0.228296	1.04332	0.387097	0.5349	1	374	tags=87%, list=65%, signal=238%
	IMMUNE SYSTEM PROCESS%GOBP%GO:0002376	39	0.145997	1.03235	0.375451	0.549348	1	441	tags=90%, list=76%, signal=351%
	NEGATIVE REGULATION OF MACROMOLECULE BIOSYNTHETIC PROCESS%GOBP%GO:0010558	30	0.162519	1.02676	0.4	0.555641	1	470	tags=97%, list=81%, signal=487%
	POSITIVE REGULATION OF NUCLEOBASE-CONTAINING COMPOUND METABOLIC PROCESS%GOBP%GO:0045935	47	0.133597	1.01273	0.432143	0.575014	1	459	tags=91%, list=79%, signal=406%
	CARBOXYLIC ACID METABOLIC PROCESS%GOBP%GO:0019752	17	0.209619	1.01139	0.447937	0.574107	1	226	tags=59%, list=39%, signal=94%
	CELLULAR RESPONSE TO CHEMICAL STIMULUS%GOBP%GO:0070887	48	0.135357	1.01052	0.427007	0.572662	1	316	tags=67%, list=55%, signal=135%
	POSITIVE REGULATION OF MACROMOLECULE BIOSYNTHETIC PROCESS%GOBP%GO:0010557	46	0.1312	1.01002	0.426025	0.570455	1	459	tags=91%, list=79%, signal=406%
	POSITIVE REGULATION OF CELL PROLIFERATION%GOBP%GO:0008284	21	0.187013	1.00968	0.439771	0.568121	1	285	tags=67%, list=49%, signal=127%
	POSITIVE REGULATION OF NUCLEIC ACID-TEMPLATED TRANSCRIPTION%GOBP%GO:1903508	39	0.140125	1.00953	0.438889	0.565415	1	459	tags=92%, list=79%, signal=415%
	REGULATION OF PROTEIN PHOSPHORYLATION%GOBP%GO:0001932	33	0.152481	1.00869	0.404097	0.5639	1	340	tags=73%, list=59%, signal=166%
	POSITIVE REGULATION OF RNA BIOSYNTHETIC PROCESS%GOBP%GO:1902680	39	0.140125	1.00819	0.409894	0.561791	1	459	tags=92%, list=79%, signal=415%
	CELL DIFFERENTIATION%GOBP%GO:0030154	60	0.118456	1.00438	0.439068	0.565016	1	470	tags=92%, list=81%, signal=436%
	NEGATIVE REGULATION OF CELLULAR MACROMOLECULE BIOSYNTHETIC PROCESS%GOBP%GO:2000113	30	0.162519	1.00343	0.45053	0.563737	1	470	tags=97%, list=81%, signal=487%
	NEGATIVE REGULATION OF CELL DEATH%GOBP%GO:0060548	16	0.207239	0.989617	0.43609	0.583307	1	426	tags=94%, list=74%, signal=345%
	NEGATIVE REGULATION OF GENE EXPRESSION%GOBP%GO:0010629	35	0.142106	0.970031	0.464552	0.611698	1	125	tags=34%, list=22%, signal=41%
	POSITIVE REGULATION OF GENE EXPRESSION%GOBP%GO:0010628	45	0.128852	0.969281	0.443414	0.609975	1	459	tags=91%, list=79%, signal=405%
	REGULATION OF ANATOMICAL STRUCTURE MORPHOGENESIS%GOBP%GO:0022603	17	0.199566	0.96402	0.5	0.615312	1	164	tags=47%, list=28%, signal=64%
	REGULATION OF PROTEIN LOCALIZATION%GOBP%GO:0032880	15	0.210635	0.962394	0.49053	0.614973	1	307	tags=73%, list=53%, signal=152%
	POSITIVE REGULATION OF TRANSCRIPTION, DNA-TEMPLATED%GOBP%GO:0045893	39	0.140125	0.960729	0.477011	0.614547	1	459	tags=92%, list=79%, signal=415%
	POSITIVE REGULATION OF MULTICELLULAR ORGANISMAL PROCESS%GOBP%GO:0051240	30	0.152065	0.955861	0.511538	0.619546	1	113	tags=33%, list=20%, signal=39%
	POSITIVE REGULATION OF PROTEIN MODIFICATION PROCESS%GOBP%GO:0031401	32	0.145768	0.954923	0.515483	0.618056	1	285	tags=63%, list=49%, signal=116%
	REGULATION OF CELL DEVELOPMENT%GOBP%GO:0060284	15	0.208975	0.947914	0.510806	0.62672	1	270	tags=67%, list=47%, signal=122%
	RNA PROCESSING%GOBP%GO:0006396	24	0.164821	0.944783	0.512104	0.628837	1	416	tags=88%, list=72%, signal=298%
	POSITIVE REGULATION OF MOLECULAR FUNCTION%GOBP%GO:0044093	34	0.138899	0.926121	0.526217	0.656586	1	285	tags=62%, list=49%, signal=114%
	NEGATIVE REGULATION OF NUCLEIC ACID-TEMPLATED TRANSCRIPTION%GOBP%GO:1903507	26	0.156115	0.922972	0.547971	0.658358	1	470	tags=96%, list=81%, signal=488%
	ADAPTIVE IMMUNE SYSTEM%REACTOME%R-HSA-1280218.4	20	0.175645	0.921079	0.547025	0.658478	1	338	tags=75%, list=58%, signal=174%
	NEGATIVE REGULATION OF RNA METABOLIC PROCESS%GOBP%GO:0051253	27	0.15785	0.920161	0.573284	0.656938	1	470	tags=96%, list=81%, signal=488%
	REGULATION OF CELL PROLIFERATION%GOBP%GO:0042127	36	0.135607	0.918081	0.542279	0.657444	1	426	tags=86%, list=74%, signal=306%
	CELLULAR RESPONSE TO ENDOGENOUS STIMULUS%GOBP%GO:0071495	23	0.162345	0.916318	0.552239	0.657384	1	340	tags=74%, list=59%, signal=172%
	REGULATION OF TRANSCRIPTION BY RNA POLYMERASE II%GOBP%GO:0006357	53	0.112799	0.914275	0.554328	0.657765	1	476	tags=92%, list=82%, signal=472%
	REGULATION OF MOLECULAR FUNCTION%GOBP%GO:0065009	60	0.107683	0.914036	0.526316	0.65511	1	53	tags=18%, list=9%, signal=18%
	PROTEIN METABOLIC PROCESS%GOBP%GO:0019538	75	0.0982357	0.910712	0.570671	0.657147	1	316	tags=63%, list=55%, signal=120%
	RESPONSE TO ENDOGENOUS STIMULUS%GOBP%GO:0009719	23	0.162345	0.910129	0.565789	0.655074	1	340	tags=74%, list=59%, signal=172%
	POSITIVE REGULATION OF CATALYTIC ACTIVITY%GOBP%GO:0043085	27	0.151413	0.909269	0.565891	0.65352	1	178	tags=44%, list=31%, signal=61%
	REGULATION OF MULTICELLULAR ORGANISMAL PROCESS%GOBP%GO:0051239	58	0.109487	0.90701	0.561468	0.6544	1	285	tags=59%, list=49%, signal=104%
	NEGATIVE REGULATION OF TRANSCRIPTION, DNA-TEMPLATED%GOBP%GO:0045892	26	0.156115	0.905156	0.573864	0.654323	1	470	tags=96%, list=81%, signal=488%
	NEGATIVE REGULATION OF RNA BIOSYNTHETIC PROCESS%GOBP%GO:1902679	26	0.156115	0.902689	0.552783	0.655372	1	470	tags=96%, list=81%, signal=488%
	SIGNALING BY GPCR%REACTOME DATABASE ID RELEASE 73%372790	23	0.161114	0.897779	0.585821	0.660103	1	315	tags=70%, list=54%, signal=147%
	REGULATION OF CELLULAR LOCALIZATION%GOBP%GO:0060341	16	0.188461	0.897711	0.549213	0.65731	1	330	tags=75%, list=57%, signal=170%
	METABOLISM%REACTOME%R-HSA-1430728.9	37	0.132701	0.895657	0.587156	0.657768	1	353	tags=73%, list=61%, signal=175%
	REGULATION OF MAPK CASCADE%GOBP%GO:0043408	15	0.200104	0.891608	0.59381	0.660917	1	315	tags=73%, list=54%, signal=157%
	REGULATION OF PHOSPHATE METABOLIC PROCESS%GOBP%GO:0019220	40	0.125446	0.889172	0.570384	0.661782	1	340	tags=70%, list=59%, signal=158%
	POSITIVE REGULATION OF INTRACELLULAR SIGNAL TRANSDUCTION%GOBP%GO:1902533	26	0.152524	0.887309	0.586142	0.661941	1	429	tags=88%, list=74%, signal=326%
	REGULATION OF PHOSPHORUS METABOLIC PROCESS%GOBP%GO:0051174	40	0.125446	0.882191	0.59246	0.666487	1	340	tags=70%, list=59%, signal=158%
	REGULATION OF CATALYTIC ACTIVITY%GOBP%GO:0050790	45	0.113753	0.87828	0.589091	0.66931	1	84	tags=24%, list=15%, signal=26%
	SECRETION%GOBP%GO:0046903	17	0.180345	0.876063	0.627413	0.669796	1	174	tags=47%, list=30%, signal=65%
	CELLULAR RESPONSE TO ORGANIC SUBSTANCE%GOBP%GO:0071310	39	0.119063	0.854156	0.635359	0.699879	1	456	tags=90%, list=79%, signal=394%
	METABOLISM OF PROTEINS%REACTOME%R-HSA-392499.7	42	0.113552	0.848907	0.651625	0.705009	1	410	tags=81%, list=71%, signal=257%
	NEGATIVE REGULATION OF PHOSPHATE METABOLIC PROCESS%GOBP%GO:0045936	16	0.178619	0.83642	0.654902	0.721098	1	442	tags=94%, list=76%, signal=385%
	NEGATIVE REGULATION OF PHOSPHORUS METABOLIC PROCESS%GOBP%GO:0010563	16	0.178619	0.834541	0.642715	0.720997	1	442	tags=94%, list=76%, signal=385%
	REGULATION OF PHOSPHORYLATION%GOBP%GO:0042325	36	0.118892	0.806955	0.672161	0.760166	1	340	tags=69%, list=59%, signal=158%
	METABOLISM OF RNA%REACTOME DATABASE ID RELEASE 73%8953854	16	0.168694	0.802807	0.705556	0.763251	1	233	tags=56%, list=40%, signal=92%
	REGULATION OF CELL DIFFERENTIATION%GOBP%GO:0045595	32	0.124014	0.802437	0.693333	0.760669	1	279	tags=59%, list=48%, signal=108%
	REGULATION OF DEFENSE RESPONSE%GOBP%GO:0031347	20	0.154502	0.80223	0.711504	0.757911	1	435	tags=90%, list=75%, signal=349%
	REGULATION OF MULTICELLULAR ORGANISMAL DEVELOPMENT%GOBP%GO:2000026	33	0.12081	0.793763	0.726606	0.767259	1	165	tags=39%, list=28%, signal=52%
	PROTEIN UBIQUITINATION%GOBP%GO:0016567	16	0.159638	0.763655	0.76036	0.80747	1	310	tags=69%, list=54%, signal=144%
	NCRNA METABOLIC PROCESS%GOBP%GO:0034660	17	0.155585	0.750062	0.785579	0.823744	1	119	tags=35%, list=21%, signal=43%
	ORGANELLE ASSEMBLY%GOBP%GO:0070925	16	0.15903	0.746348	0.799611	0.825575	1	131	tags=38%, list=23%, signal=47%
	IMMUNE RESPONSE%GOBP%GO:0006955	15	0.164348	0.742881	0.772358	0.827165	1	180	tags=47%, list=31%, signal=66%
	NEGATIVE REGULATION OF TRANSCRIPTION BY RNA POLYMERASE II%GOBP%GO:0000122	19	0.140599	0.731411	0.805556	0.839099	1	46	tags=21%, list=8%, signal=22%
	ION HOMEOSTASIS%GOBP%GO:0050801	15	0.159459	0.7277	0.808712	0.841007	1	414	tags=87%, list=72%, signal=296%
	POSITIVE REGULATION OF TRANSCRIPTION BY RNA POLYMERASE II%GOBP%GO:0045944	30	0.11412	0.72588	0.806798	0.84008	1	459	tags=90%, list=79%, signal=412%
	NEGATIVE REGULATION OF DEVELOPMENTAL PROCESS%GOBP%GO:0051093	16	0.154996	0.721484	0.801852	0.842528	1	313	tags=69%, list=54%, signal=146%
	LEUKOCYTE ACTIVATION%GOBP%GO:0045321	16	0.153529	0.717322	0.804223	0.844769	1	385	tags=81%, list=66%, signal=236%
	NEGATIVE REGULATION OF MOLECULAR FUNCTION%GOBP%GO:0044092	27	0.117609	0.71489	0.809524	0.844517	1	238	tags=52%, list=41%, signal=84%
	POSITIVE REGULATION OF DEVELOPMENTAL PROCESS%GOBP%GO:0051094	19	0.139913	0.713797	0.816547	0.842734	1	108	tags=32%, list=19%, signal=38%
	PROTEIN MODIFICATION BY SMALL PROTEIN CONJUGATION%GOBP%GO:0032446	18	0.13992	0.689607	0.840909	0.868798	1	310	tags=67%, list=54%, signal=139%
	REGULATION OF TRANSFERASE ACTIVITY%GOBP%GO:0051338	25	0.119607	0.683764	0.847036	0.872112	1	53	tags=20%, list=9%, signal=21%
	REGULATION OF KINASE ACTIVITY%GOBP%GO:0043549	20	0.118026	0.614623	0.926415	0.935972	1	53	tags=20%, list=9%, signal=21%
	POSITIVE REGULATION OF PHOSPHATE METABOLIC PROCESS%GOBP%GO:0045937	28	0.100686	0.613697	0.931095	0.93316	1	340	tags=68%, list=59%, signal=156%
	POSITIVE REGULATION OF PHOSPHORUS METABOLIC PROCESS%GOBP%GO:0010562	28	0.100686	0.591425	0.938776	0.946973	1	340	tags=68%, list=59%, signal=156%
	NEGATIVE REGULATION OF MULTICELLULAR ORGANISMAL PROCESS%GOBP%GO:0051241	21	0.0980521	0.526216	0.985637	0.978703	1	279	tags=57%, list=48%, signal=106%
