# Supplementary figures and images for: Formation of skill of interpretation of legal documents and potential of graphic means registrations of the text
Source: eLife journal article supplement (doi:10.7554/elife.58178), 2011-01-01

Figure 5 - figure supplement 1

A

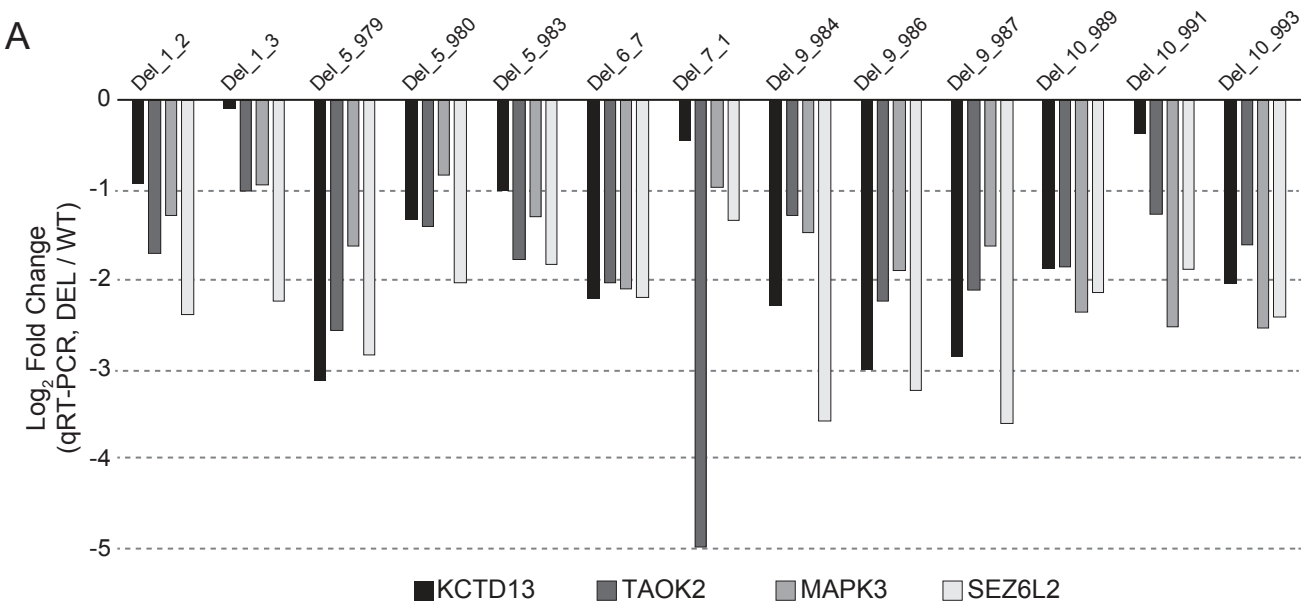

B

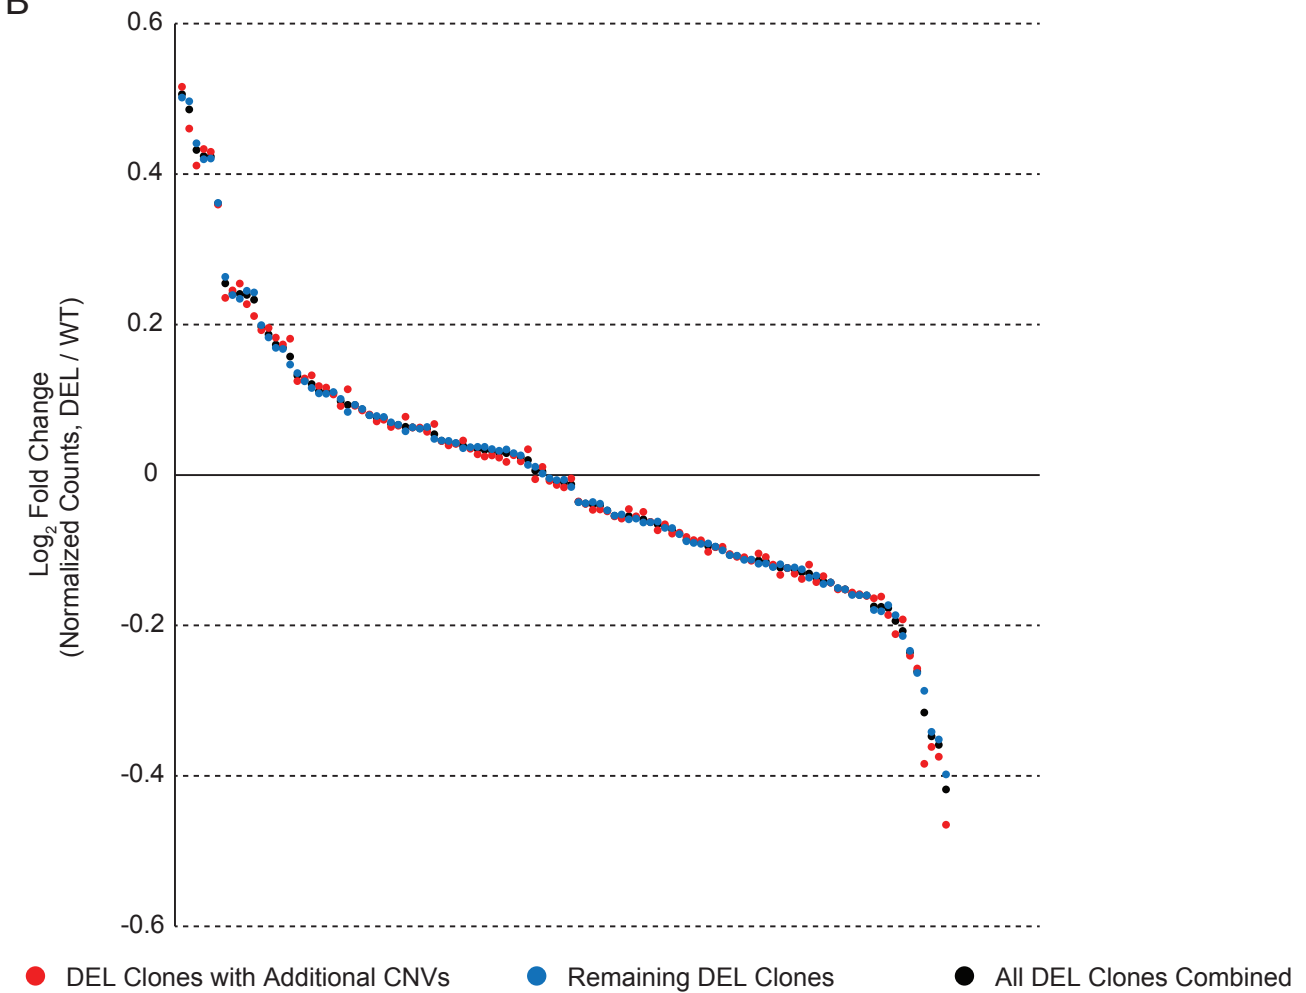

Supplement: supp [file elife-58178-supp-v1.zip]

Figure 6 - figure supplement 3

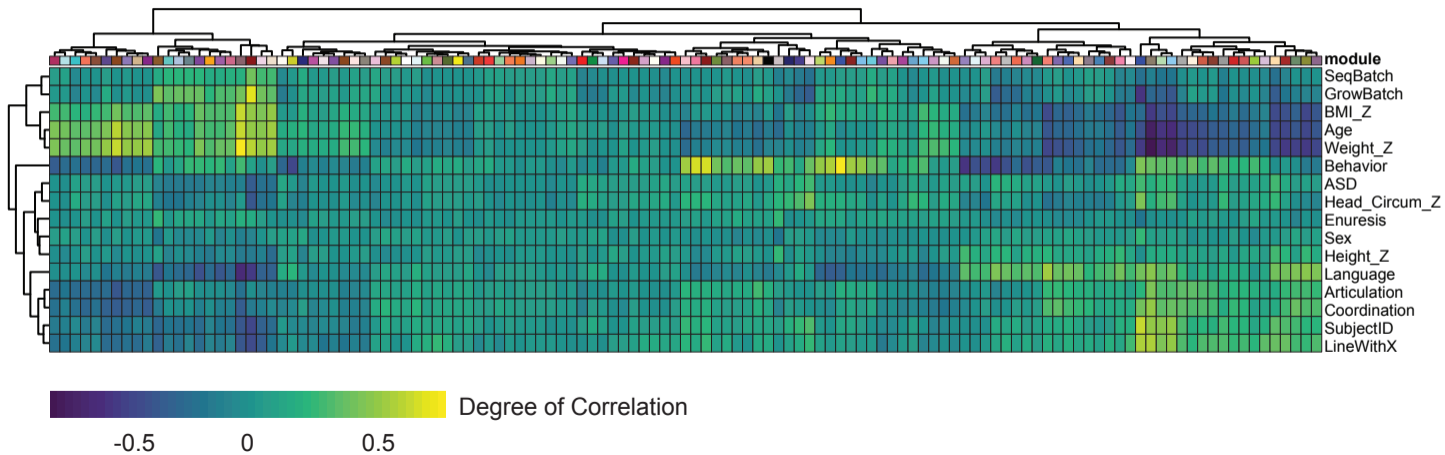

Supplement: supp [file elife-58178-supp-v1.zip]

Figure 2 - figure supplement 1

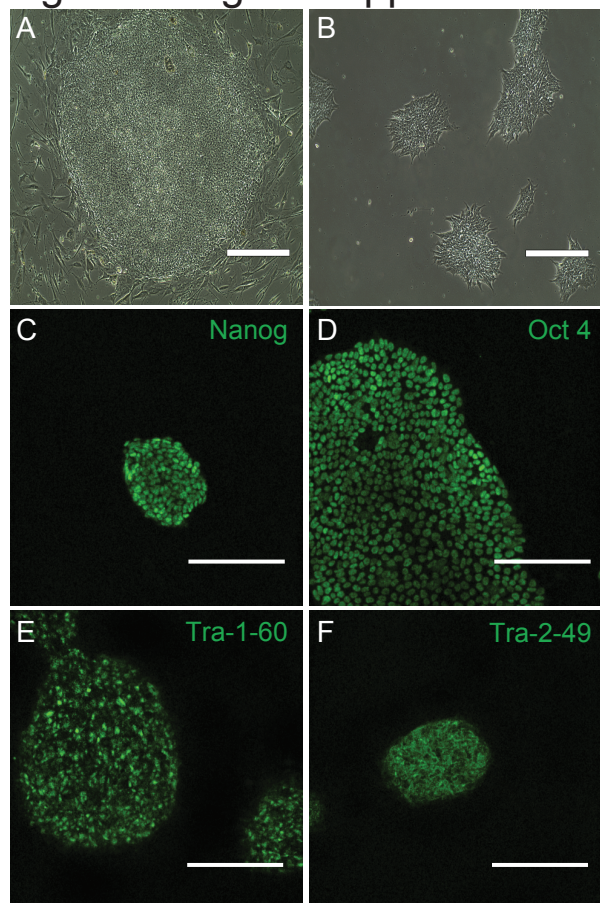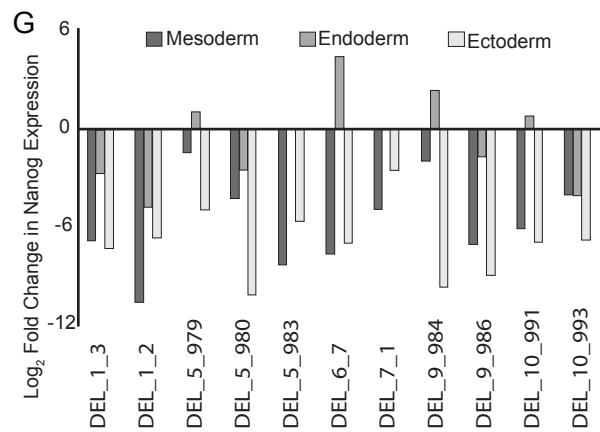

Supplement: supp [file elife-58178-supp-v1.zip]

Figure 5 - figure supplement 2

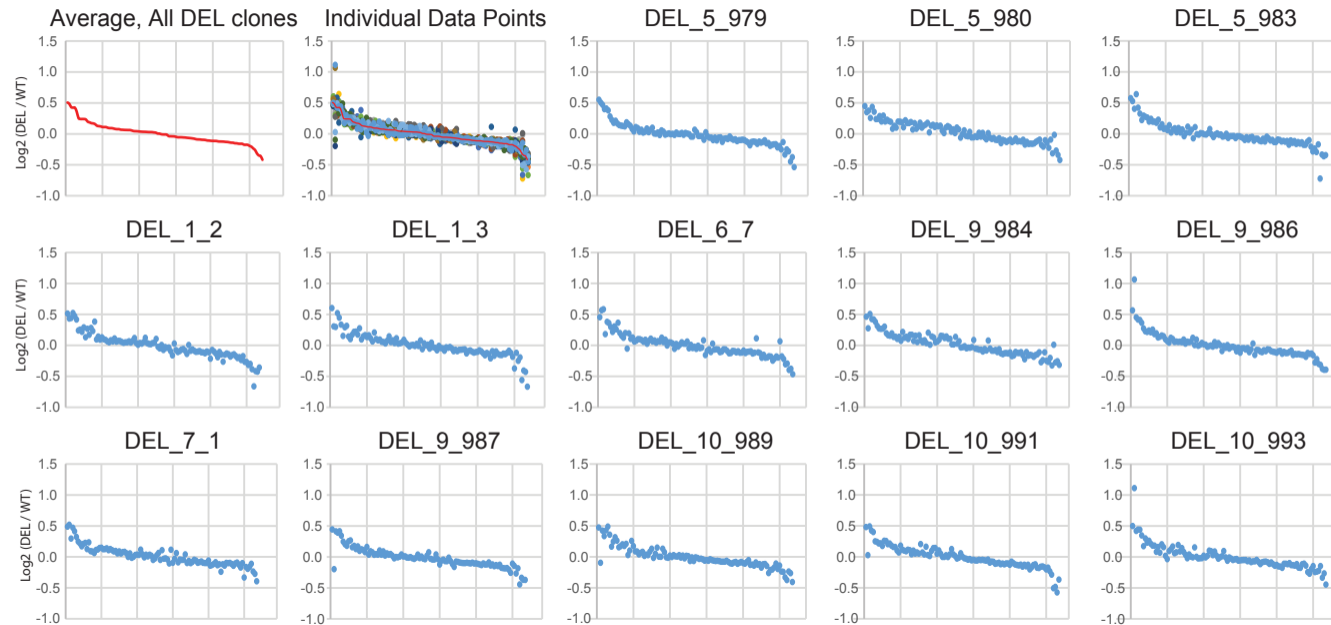

Supplement: supp [file elife-58178-supp-v1.zip]

Figure 4 - figure supplement 2

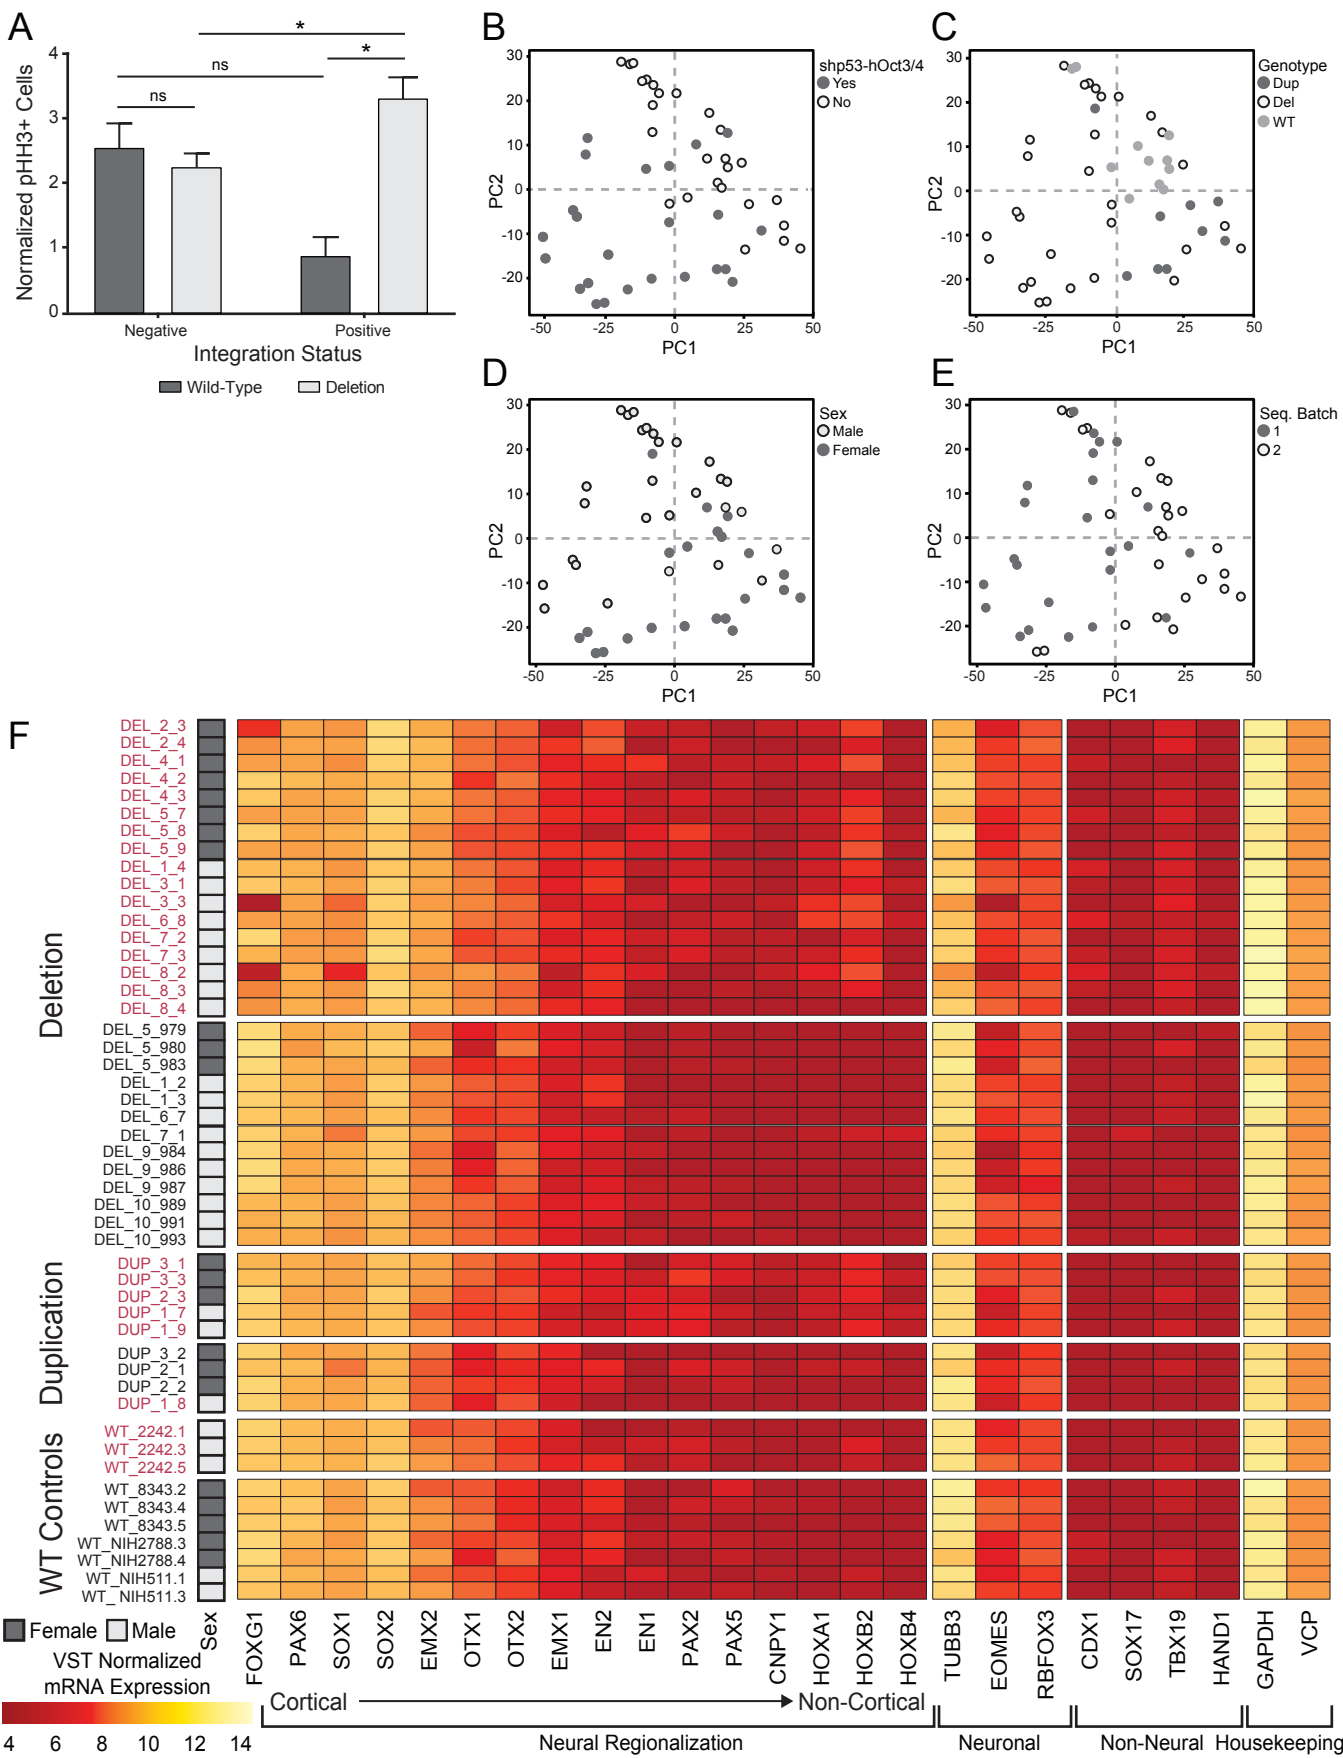

Supplement: supp [file elife-58178-supp-v1.zip]

Figure 3 - figure supplement 1

A

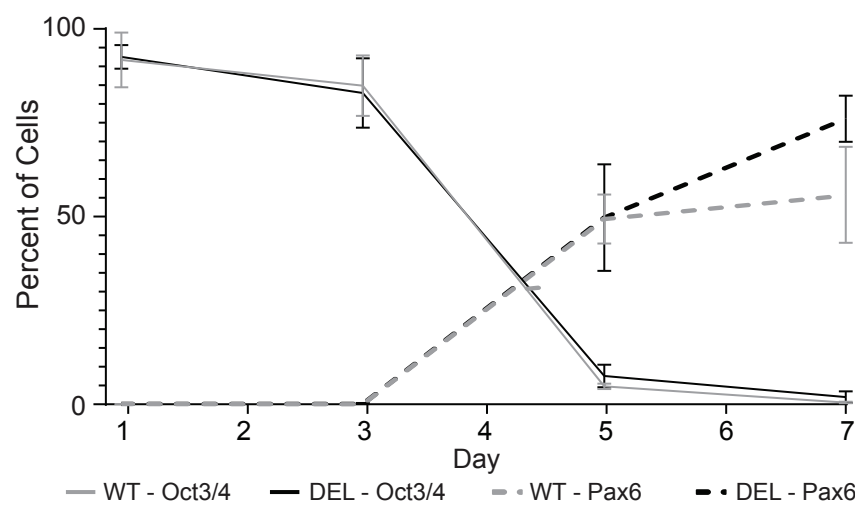

B

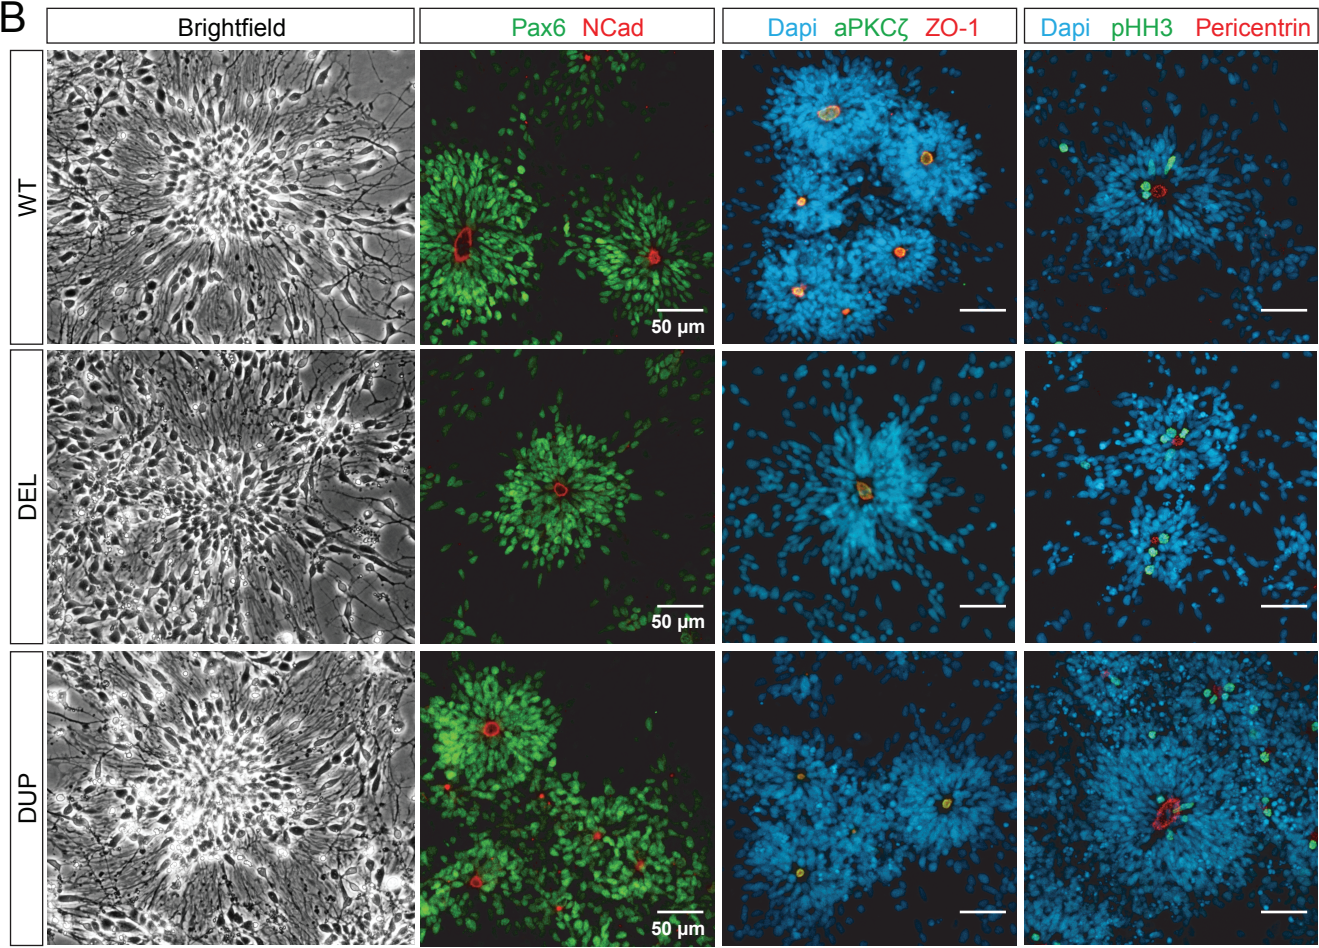

C

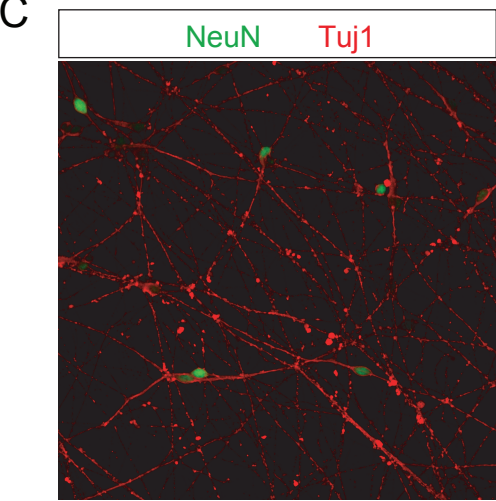

Supplement: supp [file elife-58178-supp-v1.zip]

Figure 5 - figure supplement 3

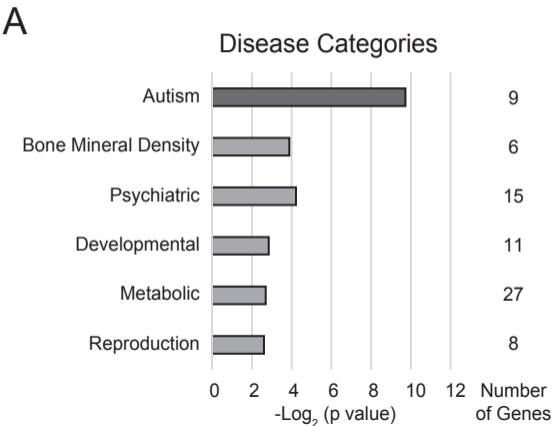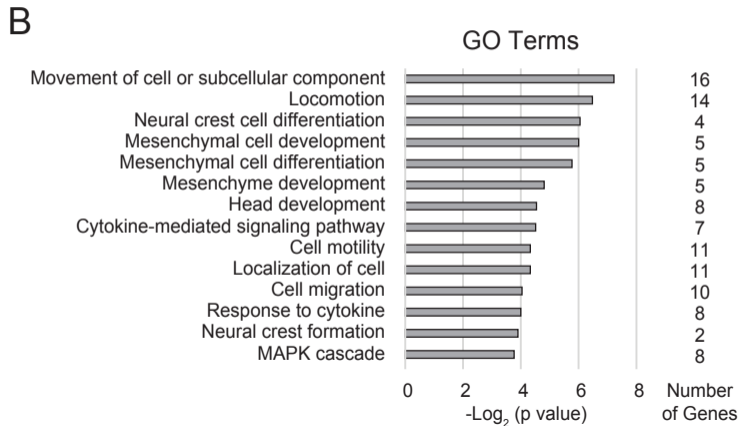

Supplement: supp [file elife-58178-supp-v1.zip]

Figure 6 - figure supplement 1

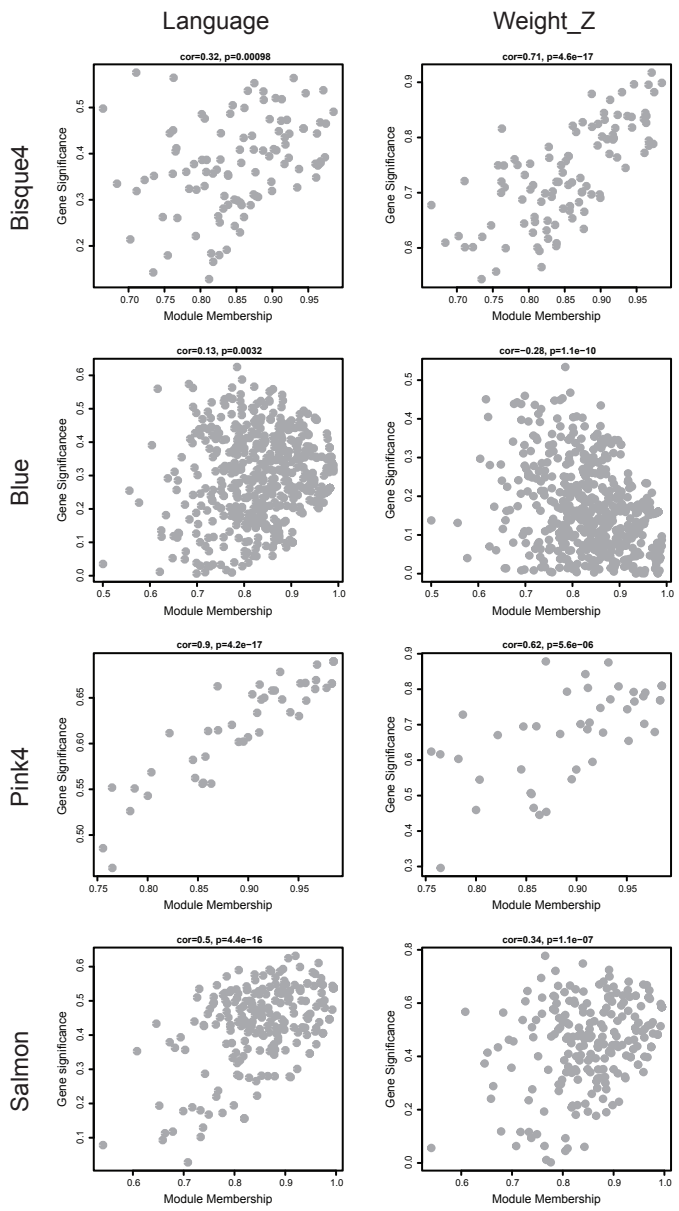

Supplement: supp [file elife-58178-supp-v1.zip]

Figure 5 - figure supplement 4

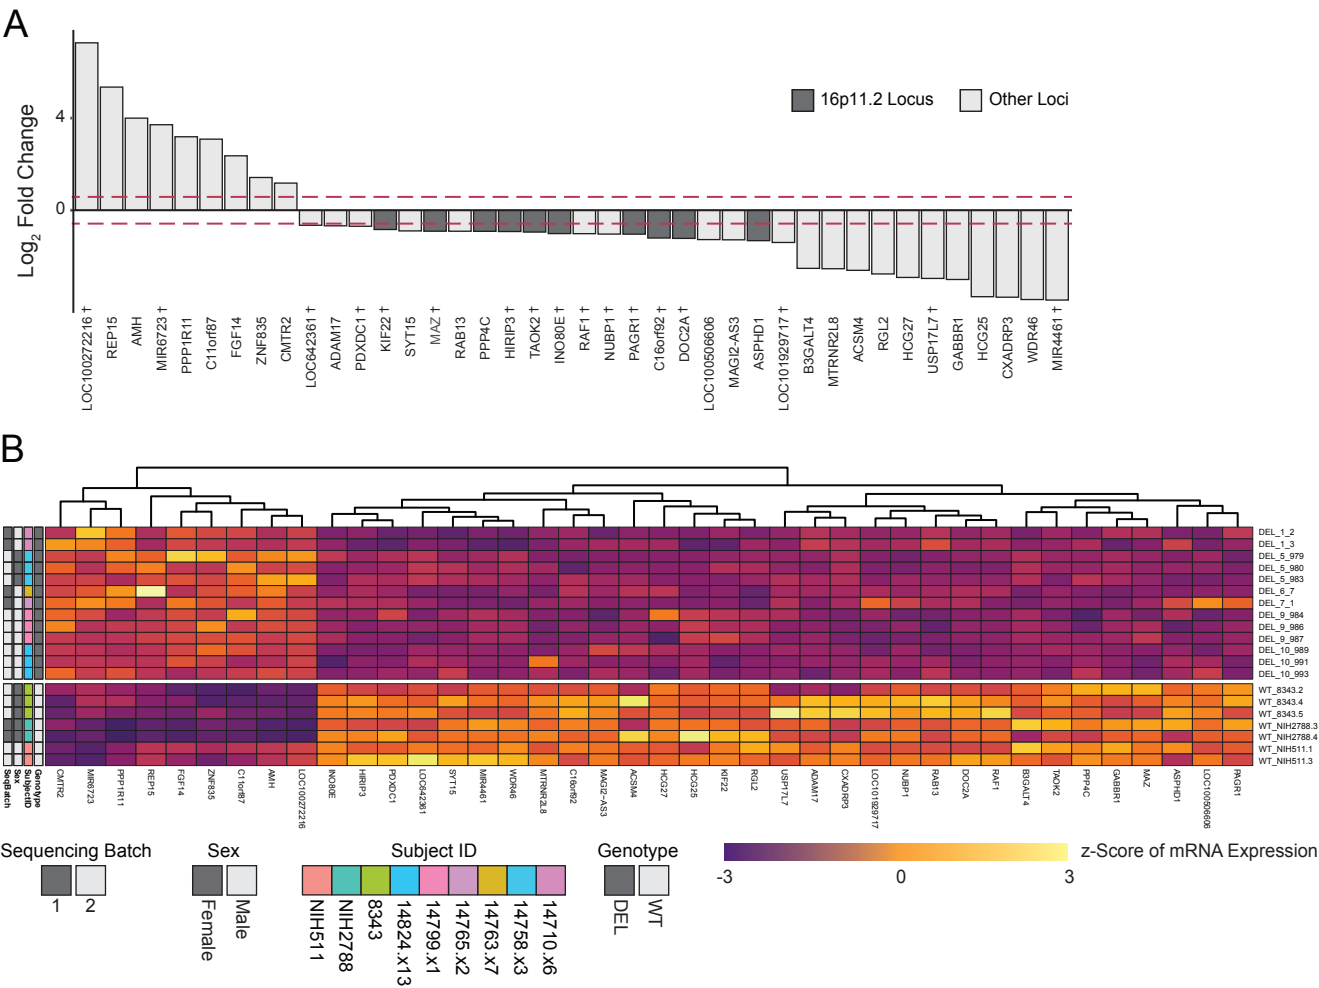

Supplement: supp [file elife-58178-supp-v1.zip]
